# Supplementary material for: Reactions of a persistent phosphinyl radical/diphosphine with heteroallenes
Source: Royal Society of Chemistry journal article supplement (doi:10.1039/c6dt02790c), 2016-01-01
Supplement: c6dt02790c1.pdf [file c6dt02790c1.pdf]

## Reactions of a Persistent Phosphinyl Radical/diphosphine with Heteroallenes

Nick A. Giffin, Arthur D. Hendsbee and Jason D. Masuda

<sup>a</sup>The Atlantic Centre for Green Chemistry and the Department of Chemistry, Saint Mary's University, Halifax Nova Scotia, Canada B3H 3C3.

\*E-mail Jason.masuda@smu.ca; Tel. +1-902-420-5077

Supporting Information

|                                                                                                                                                                   |            |
|-------------------------------------------------------------------------------------------------------------------------------------------------------------------|------------|
| <b>General Synthetic Procedures</b>                                                                                                                               | <b>S2</b>  |
| <b>Synthetic procedures for compounds 2, 3 and 4</b>                                                                                                              | <b>S4</b>  |
| <b>General X-ray Crystallography Procedures</b>                                                                                                                   |            |
| <b>Table 1 Crystallographic Data for Compounds 2-4</b>                                                                                                            |            |
| <b>Figure S1</b> Single crystal structure of 4. Thermal ellipsoids are displayed at 50% probability; isopropyl groups and hydrogen atoms are removed for clarity. |            |
| <b>Figure S2</b> Overlay of structures from compounds 3 (sulfur = yellow) and 4 (oxygen = red).                                                                   |            |
| <b>Crystallography tables for compound 2</b>                                                                                                                      | <b>S7</b>  |
| <b>Crystallography tables for compound 3</b>                                                                                                                      | <b>S25</b> |
| <b>Crystallography tables for compound 4</b>                                                                                                                      | <b>S45</b> |

### General Synthetic Procedures

All reactions were performed in dry, O<sub>2</sub>-free conditions under an atmosphere of N<sub>2</sub> within an mBraun Labmaster SP inert atmosphere drybox or sealed reaction vessels using standard Schlenk techniques. Synthesis of ligand **1** was done via our literature procedure (*Inorg. Chem.*, 2012, **51**, 11837-11850). All reagents were purchased from Sigma-Aldrich and used as received, unless otherwise noted. Alumina and molecular sieves were pre-dried in a 150°C oven before being dried at 300°C in vacuo. Solvents were purified using an Innovative Technology solvent purification system or purchased as 'anhydrous' from Sigma-Aldrich. Solvents were then dried using KH and subsequently filtered through dry alumina and stored over previously dried 3Å molecular sieves. Glassware was dried at 150°C overnight prior to experimentation. NMR spectra were recorded on a Bruker Avance 300MHz spectrometer. Trace amounts of non-deuterated solvent were used as internal references for <sup>1</sup>H NMR spectra and were referenced relative to tetramethylsilane. The deuterated solvent was used as an internal reference

for  $^{13}\text{C}\{^1\text{H}\}$  NMR spectra and referenced relative to tetramethylsilane.  $^{31}\text{P}$  NMR spectra were referenced to external phosphoric acid. Coupling constants are reported as absolute values. Melting points were recorded on an Electrothermal MEL-Temp 3.0 using glass capillaries sealed under inert conditions. Elemental analysis was performed by the Centre for Environmental Analysis and Remediation (CEAR) facility at Saint Mary's University using a Perkin Elmer 2400 II series Elemental Analyser.

### Preparation of $\text{Dipp}_2\text{C}_2\text{H}_4\text{N}_2\text{P-S-C(=S)-PN}_2\text{H}_4\text{C}_2\text{Dipp}_2$ **2**

In a 20 mL scintillation vial, 200 mg (0.244 mmol) of diphosphine **1** was dissolved in 5 mL of toluene to give an orange colored solution. With rapid stirring, 15.0  $\mu\text{L}$  (0.244 mmol) of  $\text{CS}_2$  was added using a micro-pipette. The orange colored solution transitions to bright turquoise color over several seconds. After stirring for 30 min, the solution was filtered through a pad of diatomaceous earth and crystallized *via* slow evaporation of the solvent at ambient temperatures yielded X-ray quality, turquoise colored crystals. Removal of the solvent afforded 205 mg of analytically pure solid. (94 % yield).  $^{31}\text{P}\{^1\text{H}\}$  (121.5 MHz,  $\text{C}_6\text{D}_6$ )  $\delta$ : 133.10 (d,  $^3\text{J}_{\text{P-P}} = 8$  Hz), 92.36 (d,  $^3\text{J}_{\text{P-P}} = 8$  Hz).  $^1\text{H}$  (300 MHz,  $\text{C}_6\text{D}_6$ )  $\delta$ : 7.20-7.16 (m, 6H, Ar-H), 7.14-7.03 (m, 6H, Ar-H), 4.19-4.04 (m, 4H, overlapping sept(CH)/m{CH<sub>2</sub>}) 3.82 (sept, 2H, CH,  $^3\text{J}_{\text{H-H}} = 7$  Hz), 3.71 (m, 2H, CH<sub>2</sub>,  $^3\text{J}_{\text{H-H}} = 7$  Hz), 3.60 (sept, 4H, CH,  $^3\text{J}_{\text{H-H}} = 7$  Hz), 3.23 (sept, 4H, CH,  $^3\text{J}_{\text{H-H}} = 7$  Hz), 1.45-1.41 (overlapping doublets, 12H, CH<sub>3</sub>), 1.30-1.26 (overlapping doublets, 27H, CH<sub>3</sub>), 1.15 (d, 6H, CH<sub>3</sub>,  $^3\text{J}_{\text{H-H}} = 7$  Hz) 0.94-0.89 (m, 3H, CH<sub>3</sub>).  $^{13}\text{C}\{^1\text{H}\}$  (75.4 MHz,  $\text{C}_6\text{D}_6$ )  $\delta$ : 149.55, 149.36, 147.59, 147.50, 138.36 (dd, P-C(S)-S-P,  $^1\text{J}_{\text{P-C}} = 134.7$  Hz,  $^2\text{J}_{\text{P'-C}} = 11.5$  Hz), 127.00, 124.54, 124.17, 55.51, 55.40, 34.41, 29.45, 29.31, 29.23, 28.99, 28.80, 26.10, 26.00, 25.91, 25.57, 25.37, 25.31, 24.41, 24.25, 22.69, 14.24. M.P.: 169-172 °C. Anal calc for  $\text{C}_{53}\text{H}_{76}\text{N}_4\text{PS}_2 \cdot 1/2\text{C}_7\text{H}_8$ : C, 72.09; H, 8.57; N, 5.95. Found: C, 71.70; H, 7.98; N, 6.20.

### Preparation of $\text{Dipp}_2\text{C}_2\text{H}_4\text{N}_2\text{P-O-C(=N-Ph)-PN}_2\text{H}_4\text{C}_2\text{Dipp}_2$ **3**

In a 20 mL scintillation vial, 100mg (0.122 mmol) of diphosphine **1** was dissolved in 5 mL of toluene to give an orange colored solution. With rapid stirring, 13.3  $\mu\text{L}$  (0.122 mmol) of phenyl isocyanate was added using a micro-pipette. The orange colored solution transitions to pale yellow color overnight. Removal of solvent yielded a colorless powder which was dissolved in ca. 5 mL of pentane and filtered through a pad of diatomaceous earth. Colourless, X-ray quality crystals of **3** were grown from a pentane solution at -35 °C, yielding 92 mg of **3** (80 % yield).  $^{31}\text{P}\{^1\text{H}\}$  (121.5 MHz,  $\text{C}_6\text{D}_6$ )  $\delta$ : 122.36, 84.74.  $^1\text{H}$  (300 MHz,  $\text{C}_6\text{D}_6$ )  $\delta$ : 7.23-6.99 (br m, 16H, Ar-H), 6.61 (br s, 2H, Ar-H), 5.56 (br s, 2H, Ar-H), 4.37-3.95 (br m, 4H, CH/CH<sub>2</sub>), 3.87-3.64 (br m, 2H, CH/CH<sub>2</sub>), 3.49 (br m, 4H, CH/CH<sub>2</sub>), 3.33 (br m, 2H, CH/CH<sub>2</sub>), 3.13 (br m, 4H, CH/CH<sub>2</sub>), 1.72-0.57 (br m, 48H, CH<sub>3</sub>).  $^{13}\text{C}\{^1\text{H}\}$  (75.4 MHz,  $\text{C}_6\text{D}_6$ )  $\delta$ : 149.91, 148.86, 147.41, 139.66, 129.29, 126.74, 124.66, 123.05, 121.91, 55.55, 55.32, 28.88, 28.14, 25.92, 24.85, 24.66, 23.76. M.P.: 112-114 °C. Anal calc for  $\text{C}_{59}\text{H}_{81}\text{N}_5\text{PO} \cdot 1/2\text{C}_7\text{H}_8$ : C, 76.26; H, 8.70; N, 7.11. Found: C, 76.30; H, 8.57; N, 6.86.

#### Preparation of Dipp<sub>2</sub>C<sub>2</sub>H<sub>4</sub>N<sub>2</sub>P-S-C(=N-Ph)-PN<sub>2</sub>H<sub>4</sub>C<sub>2</sub>Dipp<sub>2</sub> **4**

In a 20 mL scintillation vial, 100mg (0.122 mmol) of diphosphine **1** was dissolved in 5 mL of toluene to give an orange colored solution. With rapid stirring, 14.5  $\mu$ L (0.244 mmol) of phenyl isothiocyanate (Ph-NCS) was added using a micro-pipette. The orange solution transitions to a pale yellow over 5 days. Removal of solvent afforded a yellow powder which was subsequently dissolved in ca. 5 mL of pentanes and filtered through a pad of diatomaceous earth. X-ray quality crystals of **18** were grown from a pentane solution at -35 °C containing a trace amount of benzene, yielding 98 mg of material (84 % yield). <sup>31</sup>P{<sup>1</sup>H} (121.5 MHz, C<sub>6</sub>D<sub>6</sub>)  $\delta$ : 128.07 (br s), 83.81 (br s). <sup>1</sup>H (300 MHz, C<sub>6</sub>D<sub>6</sub>)  $\delta$ : 7.26-7.06 (br m, 12H, Ar-H), 6.74-6.69 (br m, 2H, Ar-H), 6.62-6.56 (br m, 3H, Ar-H), 5.54 (br s, 2H), 4.58 (br s, 1H), 4.30 (br s, 2H), 3.91-3.47 (br m, 11H, CH/CH<sub>2</sub>), 3.14 (br m, 5H, CH/CH<sub>2</sub>), 1.76-0.60 (br m, 48H, CH<sub>3</sub>). <sup>13</sup>C{<sup>1</sup>H} (75.4 MHz, C<sub>6</sub>D<sub>6</sub>)  $\delta$ : 149.87, 149.08, 148.58, 147.18, 139.21, 139.03, 129.42, 126.97, 125.70, 124.93, 124.64, 124.18, 123.45, 121.05, 55.25, 54.78, 29.07, 28.77, 25.95, 25.03, 24.13, 22.69, 14.45. M.P.: 193 °C. Anal calc for C<sub>59</sub>H<sub>81</sub>N<sub>5</sub>PS: C, 74.26; H, 8.56; N, 7.34. Found: C, 73.82; H, 8.89; N, 7.2

#### General X-ray Crystallography Procedures

Crystals of compounds **2-4** were mounted from Paratone-N oil on an appropriately sized MiTeGen MicroMount. The data were collected on a Bruker APEX II charge-coupled-device (CCD) diffractometer, with an Oxford 700 Cryocool sample cooling device. The instrument was equipped with graphite-monochromated Mo K $\alpha$  radiation ( $\lambda$  = 0.71073 Å; 30 mA, 50 mV), with MonoCap X-ray source optics. For data collection, four  $\omega$ -scan frame series were collected with 0.5° wide scans, 416 frames per series at varying  $\phi$  angles ( $\phi$  = 0°, 90°, 180°, 270°). Data collection, unit cell refinement, data processing and multi-scan absorption correction were applied using the APEX II software package.<sup>1</sup> The structures were solved using direct methods<sup>2</sup> and all non-hydrogen atoms were refined anisotropically using the shelXle<sup>3</sup> graphical user interface and the SHELX suite of programs.<sup>2</sup> Unless otherwise noted, all hydrogen atom positions were idealized and rode on the atom to which they were attached. The final refinement included anisotropic temperature factors on all non-hydrogen atoms. Details of crystal data, data collection, and structure refinement are listed in Table S1. All figures were made using ORTEP-3 for Windows.<sup>4</sup> CCDC 1480970-1480972 contain the supplementary crystallographic data for compounds **2-4**. These data can be obtained free of charge from the Cambridge Crystallographic Database Centre via <https://summary.ccdc.cam.ac.uk/structure-summary-form>.

1. APEX2 Ver. 2008.5, Bruker AXS, Inc., Madison, Wisconsin, USA, 2008.
2. G. M. Sheldrick, *Acta Cryst.*, 2008, A64, 112.
3. C. B. Hübschle, G. M. Sheldrick and B. Dittrich, *J. Appl. Cryst.*, 2011, 44, 1281-1284.
4. L. J. Farrugia, *J. Appl. Cryst.*, 1997, 30, 565.

**Table S1. Crystallographic Data for Compounds 2-4**

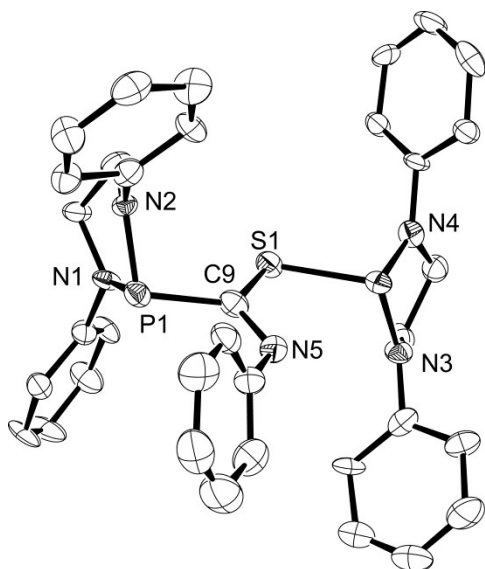

**Figure S1.** Single crystal structure of **4**. Thermal ellipsoids are displayed at 50% probability; isopropyl groups and hydrogen atoms are removed for clarity.

**Figure S2.** Overlay of structures from compounds **3** (sulfur = yellow) and **4** (oxygen = red).

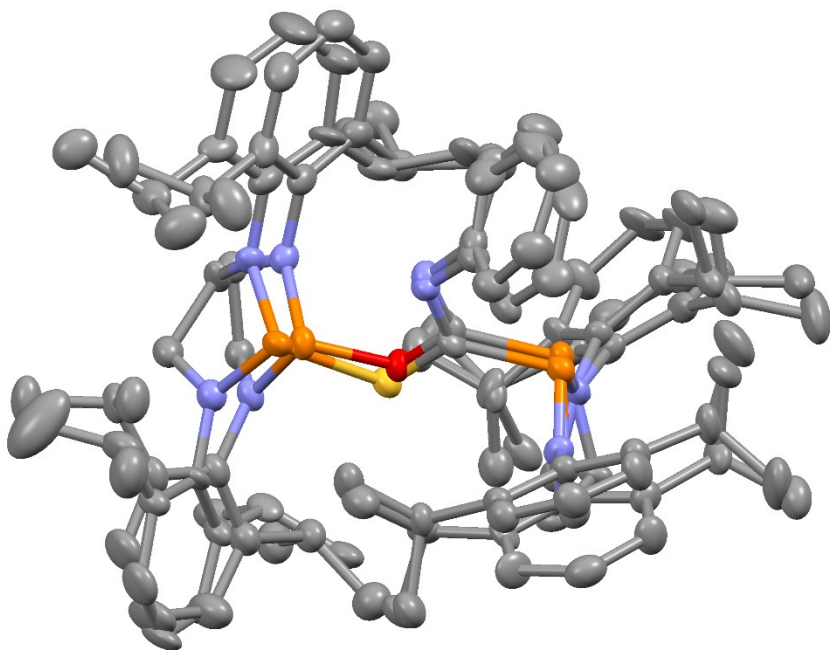

## Crystallography tables for compound 2

Table 1. Crystal data and structure refinement for 2.

|                                   |                                                                              |                 |
|-----------------------------------|------------------------------------------------------------------------------|-----------------|
| Identification code               | NG111_0m                                                                     |                 |
| Empirical formula                 | C <sub>53</sub> H <sub>76</sub> N <sub>4</sub> P <sub>2</sub> S <sub>2</sub> |                 |
| Formula weight                    | 895.23                                                                       |                 |
| Temperature                       | 150(2) K                                                                     |                 |
| Wavelength                        | 0.71073 Å                                                                    |                 |
| Crystal system                    | Monoclinic                                                                   |                 |
| Space group                       | P2 <sub>1</sub> /c                                                           |                 |
| Unit cell dimensions              | a = 16.506(3) Å                                                              | α = 90°.        |
|                                   | b = 14.607(2) Å                                                              | β = 93.218(2)°. |
|                                   | c = 21.516(3) Å                                                              | γ = 90°.        |
| Volume                            | 5179.4(14) Å <sup>3</sup>                                                    |                 |
| Z                                 | 4                                                                            |                 |
| Density (calculated)              | 1.148 Mg/m <sup>3</sup>                                                      |                 |
| Absorption coefficient            | 0.202 mm <sup>-1</sup>                                                       |                 |
| F(000)                            | 1936                                                                         |                 |
| Crystal size                      | 0.124 x 0.111 x 0.108 mm <sup>3</sup>                                        |                 |
| Theta range for data collection   | 2.059 to 25.000°.                                                            |                 |
| Index ranges                      | -19 ≤ h ≤ 19, -15 ≤ k ≤ 17, -24 ≤ l ≤ 25                                     |                 |
| Reflections collected             | 33942                                                                        |                 |
| Independent reflections           | 9113 [R(int) = 0.1375]                                                       |                 |
| Completeness to theta = 25.000°   | 100.0 %                                                                      |                 |
| Absorption correction             | Semi-empirical from equivalents                                              |                 |
| Max. and min. transmission        | 0.7457 and 0.7121                                                            |                 |
| Refinement method                 | Full-matrix least-squares on F <sup>2</sup>                                  |                 |
| Data / restraints / parameters    | 9113 / 1 / 566                                                               |                 |
| Goodness-of-fit on F <sup>2</sup> | 1.012                                                                        |                 |
| Final R indices [I > 2σ(I)]       | R1 = 0.0660, wR2 = 0.1196                                                    |                 |
| R indices (all data)              | R1 = 0.1491, wR2 = 0.1538                                                    |                 |
| Extinction coefficient            | n/a                                                                          |                 |
| Largest diff. peak and hole       | 0.412 and -0.306 e.Å <sup>-3</sup>                                           |                 |

Table 2. Atomic coordinates ( $\times 10^4$ ) and equivalent isotropic displacement parameters ( $\text{\AA}^2 \times 10^3$ ) for 2.  $U(\text{eq})$  is defined as one third of the trace of the orthogonalized  $U^{ij}$  tensor.

|       | x       | y        | z       | $U(\text{eq})$ |
|-------|---------|----------|---------|----------------|
| S(1)  | 1891(1) | -285(1)  | 2628(1) | 32(1)          |
| S(2)  | 3443(1) | 646(1)   | 3023(1) | 48(1)          |
| P(1)  | 2762(1) | -1410(1) | 2970(1) | 24(1)          |
| P(2)  | 2030(1) | 1603(1)  | 2201(1) | 25(1)          |
| N(1)  | 2524(2) | -1590(2) | 3705(1) | 21(1)          |
| N(2)  | 2266(2) | -2352(2) | 2741(1) | 23(1)          |
| N(3)  | 2547(2) | 2561(2)  | 2404(2) | 25(1)          |
| N(4)  | 2511(2) | 1524(2)  | 1520(1) | 25(1)          |
| C(1)  | 2555(2) | 641(3)   | 2657(2) | 28(1)          |
| C(2)  | 2077(3) | -2432(3) | 3816(2) | 34(1)          |
| C(3)  | 1740(3) | -2755(3) | 3192(2) | 32(1)          |
| C(4)  | 3257(2) | 2728(3)  | 2046(2) | 37(1)          |
| C(5)  | 3091(3) | 2262(3)  | 1423(2) | 39(1)          |
| C(6)  | 2788(2) | -999(3)  | 4216(2) | 20(1)          |
| C(7)  | 3597(2) | -1043(3) | 4450(2) | 26(1)          |
| C(8)  | 3838(2) | -427(3)  | 4920(2) | 32(1)          |
| C(9)  | 3313(2) | 194(3)   | 5148(2) | 30(1)          |
| C(10) | 2518(2) | 212(3)   | 4922(2) | 26(1)          |
| C(11) | 2237(2) | -383(3)  | 4453(2) | 23(1)          |
| C(12) | 4190(2) | -1729(4) | 4221(2) | 41(1)          |
| C(13) | 4595(4) | -2281(4) | 4762(2) | 87(2)          |
| C(14) | 4830(3) | -1273(4) | 3838(2) | 66(2)          |
| C(15) | 1349(2) | -367(3)  | 4234(2) | 29(1)          |
| C(16) | 835(2)  | -794(3)  | 4735(2) | 39(1)          |
| C(17) | 1035(3) | 592(3)   | 4063(2) | 45(1)          |
| C(18) | 2337(2) | -2700(3) | 2120(2) | 23(1)          |
| C(19) | 1733(2) | -2511(3) | 1654(2) | 26(1)          |
| C(20) | 1874(3) | -2784(3) | 1053(2) | 34(1)          |
| C(21) | 2582(3) | -3230(3) | 912(2)  | 41(1)          |
| C(22) | 3148(3) | -3438(3) | 1387(2) | 37(1)          |
| C(23) | 3042(2) | -3191(3) | 1996(2) | 26(1)          |

|       |         |          |         |       |
|-------|---------|----------|---------|-------|
| C(24) | 3666(2) | -3486(3) | 2505(2) | 33(1) |
| C(25) | 4498(3) | -3082(4) | 2418(3) | 72(2) |
| C(26) | 3710(3) | -4528(4) | 2547(3) | 68(2) |
| C(27) | 934(2)  | -2056(3) | 1785(2) | 31(1) |
| C(28) | 248(2)  | -2767(3) | 1760(2) | 47(1) |
| C(29) | 721(3)  | -1267(3) | 1341(2) | 43(1) |
| C(30) | 2229(2) | 3277(3)  | 2774(2) | 22(1) |
| C(31) | 2548(2) | 3414(3)  | 3391(2) | 27(1) |
| C(32) | 2218(3) | 4104(3)  | 3741(2) | 33(1) |
| C(33) | 1599(3) | 4653(3)  | 3501(2) | 34(1) |
| C(34) | 1309(3) | 4536(3)  | 2894(2) | 32(1) |
| C(35) | 1616(2) | 3862(3)  | 2523(2) | 25(1) |
| C(36) | 3245(2) | 2851(3)  | 3669(2) | 34(1) |
| C(37) | 3047(3) | 2414(4)  | 4286(2) | 66(2) |
| C(38) | 4013(3) | 3430(4)  | 3763(2) | 56(2) |
| C(39) | 1289(2) | 3791(3)  | 1848(2) | 28(1) |
| C(40) | 389(2)  | 3557(3)  | 1810(2) | 40(1) |
| C(41) | 1450(3) | 4666(3)  | 1491(2) | 47(1) |
| C(42) | 2318(2) | 872(3)   | 1036(2) | 25(1) |
| C(43) | 1574(2) | 926(3)   | 690(2)  | 29(1) |
| C(44) | 1398(3) | 266(3)   | 228(2)  | 36(1) |
| C(45) | 1941(3) | -418(3)  | 117(2)  | 40(1) |
| C(46) | 2674(3) | -454(3)  | 449(2)  | 37(1) |
| C(47) | 2882(3) | 179(3)   | 912(2)  | 31(1) |
| C(48) | 975(2)  | 1682(3)  | 768(2)  | 30(1) |
| C(49) | 133(3)  | 1335(4)  | 881(3)  | 66(2) |
| C(50) | 955(4)  | 2324(4)  | 214(2)  | 78(2) |
| C(51) | 3705(2) | 114(3)   | 1253(2) | 36(1) |
| C(52) | 4381(3) | 353(4)   | 821(2)  | 52(2) |
| C(53) | 3856(3) | -837(3)  | 1539(2) | 49(1) |

---

Table 3. Bond lengths [ $\text{\AA}$ ] and angles [ $^\circ$ ] for 2.

---

|            |            |
|------------|------------|
| S(1)-C(1)  | 1.739(4)   |
| S(1)-P(1)  | 2.2774(16) |
| S(2)-C(1)  | 1.625(4)   |
| P(1)-N(2)  | 1.663(3)   |
| P(1)-N(1)  | 1.670(3)   |
| P(2)-N(3)  | 1.683(3)   |
| P(2)-N(4)  | 1.710(3)   |
| P(2)-C(1)  | 1.895(4)   |
| N(1)-C(6)  | 1.446(5)   |
| N(1)-C(2)  | 1.461(5)   |
| N(2)-C(18) | 1.440(5)   |
| N(2)-C(3)  | 1.461(5)   |
| N(3)-C(30) | 1.432(5)   |
| N(3)-C(4)  | 1.459(5)   |
| N(4)-C(42) | 1.433(5)   |
| N(4)-C(5)  | 1.463(5)   |
| C(2)-C(3)  | 1.501(5)   |
| C(2)-H(2A) | 0.9900     |
| C(2)-H(2B) | 0.9900     |
| C(3)-H(3A) | 0.9900     |
| C(3)-H(3B) | 0.9900     |
| C(4)-C(5)  | 1.514(6)   |
| C(4)-H(4A) | 0.9900     |
| C(4)-H(4B) | 0.9900     |
| C(5)-H(5A) | 0.9900     |
| C(5)-H(5B) | 0.9900     |
| C(6)-C(11) | 1.397(5)   |
| C(6)-C(7)  | 1.402(5)   |
| C(7)-C(8)  | 1.394(6)   |
| C(7)-C(12) | 1.503(6)   |
| C(8)-C(9)  | 1.364(6)   |
| C(8)-H(8)  | 0.9500     |
| C(9)-C(10) | 1.375(5)   |
| C(9)-H(9)  | 0.9500     |



|              |          |
|--------------|----------|
| C(10)-C(11)  | 1.392(5) |
| C(10)-H(10)  | 0.9500   |
| C(11)-C(15)  | 1.514(5) |
| C(12)-C(14)  | 1.528(6) |
| C(12)-C(13)  | 1.538(6) |
| C(12)-H(12)  | 1.0000   |
| C(13)-H(13A) | 0.9800   |
| C(13)-H(13B) | 0.9800   |
| C(13)-H(13C) | 0.9800   |
| C(14)-H(14A) | 0.9800   |
| C(14)-H(14B) | 0.9800   |
| C(14)-H(14C) | 0.9800   |
| C(15)-C(17)  | 1.532(6) |
| C(15)-C(16)  | 1.542(5) |
| C(15)-H(15)  | 1.0000   |
| C(16)-H(16A) | 0.9800   |
| C(16)-H(16B) | 0.9800   |
| C(16)-H(16C) | 0.9800   |
| C(17)-H(17A) | 0.9800   |
| C(17)-H(17B) | 0.9800   |
| C(17)-H(17C) | 0.9800   |
| C(18)-C(19)  | 1.400(5) |
| C(18)-C(23)  | 1.405(5) |
| C(19)-C(20)  | 1.385(5) |
| C(19)-C(27)  | 1.518(5) |
| C(20)-C(21)  | 1.386(6) |
| C(20)-H(20)  | 0.9500   |
| C(21)-C(22)  | 1.380(6) |
| C(21)-H(21)  | 0.9500   |
| C(22)-C(23)  | 1.378(5) |
| C(22)-H(22)  | 0.9500   |
| C(23)-C(24)  | 1.524(5) |
| C(24)-C(25)  | 1.516(6) |
| C(24)-C(26)  | 1.526(6) |
| C(24)-H(24)  | 1.0000   |
| C(25)-H(25A) | 0.9800   |

|              |          |
|--------------|----------|
| C(25)-H(25B) | 0.9800   |
| C(25)-H(25C) | 0.9800   |
| C(26)-H(26A) | 0.9800   |
| C(26)-H(26B) | 0.9800   |
| C(26)-H(26C) | 0.9800   |
| C(27)-C(29)  | 1.524(6) |
| C(27)-C(28)  | 1.536(6) |
| C(27)-H(27)  | 1.0000   |
| C(28)-H(28A) | 0.9800   |
| C(28)-H(28B) | 0.9800   |
| C(28)-H(28C) | 0.9800   |
| C(29)-H(29A) | 0.9800   |
| C(29)-H(29B) | 0.9800   |
| C(29)-H(29C) | 0.9800   |
| C(30)-C(35)  | 1.409(5) |
| C(30)-C(31)  | 1.414(5) |
| C(31)-C(32)  | 1.388(6) |
| C(31)-C(36)  | 1.510(5) |
| C(32)-C(33)  | 1.376(6) |
| C(32)-H(32)  | 0.9500   |
| C(33)-C(34)  | 1.376(6) |
| C(33)-H(33)  | 0.9500   |
| C(34)-C(35)  | 1.381(5) |
| C(34)-H(34)  | 0.9500   |
| C(35)-C(39)  | 1.524(5) |
| C(36)-C(37)  | 1.523(6) |
| C(36)-C(38)  | 1.528(6) |
| C(36)-H(36)  | 1.0000   |
| C(37)-H(37A) | 0.9800   |
| C(37)-H(37B) | 0.9800   |
| C(37)-H(37C) | 0.9800   |
| C(38)-H(38A) | 0.9800   |
| C(38)-H(38B) | 0.9800   |
| C(38)-H(38C) | 0.9800   |
| C(39)-C(40)  | 1.521(5) |
| C(39)-C(41)  | 1.523(6) |

|              |          |
|--------------|----------|
| C(39)-H(39)  | 1.0000   |
| C(40)-H(40A) | 0.9800   |
| C(40)-H(40B) | 0.9800   |
| C(40)-H(40C) | 0.9800   |
| C(41)-H(41A) | 0.9800   |
| C(41)-H(41B) | 0.9800   |
| C(41)-H(41C) | 0.9800   |
| C(42)-C(43)  | 1.403(5) |
| C(42)-C(47)  | 1.411(5) |
| C(43)-C(44)  | 1.402(6) |
| C(43)-C(48)  | 1.499(6) |
| C(44)-C(45)  | 1.372(6) |
| C(44)-H(44)  | 0.9500   |
| C(45)-C(46)  | 1.371(6) |
| C(45)-H(45)  | 0.9500   |
| C(46)-C(47)  | 1.389(6) |
| C(46)-H(46)  | 0.9500   |
| C(47)-C(51)  | 1.510(6) |
| C(48)-C(49)  | 1.511(6) |
| C(48)-C(50)  | 1.515(6) |
| C(48)-H(48)  | 1.0000   |
| C(49)-H(49A) | 0.9800   |
| C(49)-H(49B) | 0.9800   |
| C(49)-H(49C) | 0.9800   |
| C(50)-H(50A) | 0.9800   |
| C(50)-H(50B) | 0.9800   |
| C(50)-H(50C) | 0.9800   |
| C(51)-C(52)  | 1.533(5) |
| C(51)-C(53)  | 1.534(6) |
| C(51)-H(51)  | 1.0000   |
| C(52)-H(52A) | 0.9800   |
| C(52)-H(52B) | 0.9800   |
| C(52)-H(52C) | 0.9800   |
| C(53)-H(53A) | 0.9800   |
| C(53)-H(53B) | 0.9800   |
| C(53)-H(53C) | 0.9800   |

|                  |            |
|------------------|------------|
| C(1)-S(1)-P(1)   | 99.48(15)  |
| N(2)-P(1)-N(1)   | 90.71(16)  |
| N(2)-P(1)-S(1)   | 102.12(12) |
| N(1)-P(1)-S(1)   | 104.05(12) |
| N(3)-P(2)-N(4)   | 91.47(16)  |
| N(3)-P(2)-C(1)   | 105.86(17) |
| N(4)-P(2)-C(1)   | 99.93(17)  |
| C(6)-N(1)-C(2)   | 120.8(3)   |
| C(6)-N(1)-P(1)   | 123.3(3)   |
| C(2)-N(1)-P(1)   | 115.8(3)   |
| C(18)-N(2)-C(3)  | 123.8(3)   |
| C(18)-N(2)-P(1)  | 120.2(3)   |
| C(3)-N(2)-P(1)   | 115.9(3)   |
| C(30)-N(3)-C(4)  | 120.1(3)   |
| C(30)-N(3)-P(2)  | 123.8(2)   |
| C(4)-N(3)-P(2)   | 114.3(3)   |
| C(42)-N(4)-C(5)  | 120.4(3)   |
| C(42)-N(4)-P(2)  | 124.9(3)   |
| C(5)-N(4)-P(2)   | 114.2(3)   |
| S(2)-C(1)-S(1)   | 124.8(3)   |
| S(2)-C(1)-P(2)   | 128.3(2)   |
| S(1)-C(1)-P(2)   | 106.9(2)   |
| N(1)-C(2)-C(3)   | 106.4(3)   |
| N(1)-C(2)-H(2A)  | 110.4      |
| C(3)-C(2)-H(2A)  | 110.4      |
| N(1)-C(2)-H(2B)  | 110.4      |
| C(3)-C(2)-H(2B)  | 110.4      |
| H(2A)-C(2)-H(2B) | 108.6      |
| N(2)-C(3)-C(2)   | 105.3(3)   |
| N(2)-C(3)-H(3A)  | 110.7      |
| C(2)-C(3)-H(3A)  | 110.7      |
| N(2)-C(3)-H(3B)  | 110.7      |
| C(2)-C(3)-H(3B)  | 110.7      |
| H(3A)-C(3)-H(3B) | 108.8      |
| N(3)-C(4)-C(5)   | 106.4(3)   |

|                    |          |
|--------------------|----------|
| N(3)-C(4)-H(4A)    | 110.5    |
| C(5)-C(4)-H(4A)    | 110.5    |
| N(3)-C(4)-H(4B)    | 110.5    |
| C(5)-C(4)-H(4B)    | 110.5    |
| H(4A)-C(4)-H(4B)   | 108.6    |
| N(4)-C(5)-C(4)     | 107.0(3) |
| N(4)-C(5)-H(5A)    | 110.3    |
| C(4)-C(5)-H(5A)    | 110.3    |
| N(4)-C(5)-H(5B)    | 110.3    |
| C(4)-C(5)-H(5B)    | 110.3    |
| H(5A)-C(5)-H(5B)   | 108.6    |
| C(11)-C(6)-C(7)    | 121.7(4) |
| C(11)-C(6)-N(1)    | 119.1(3) |
| C(7)-C(6)-N(1)     | 119.1(3) |
| C(8)-C(7)-C(6)     | 117.2(4) |
| C(8)-C(7)-C(12)    | 120.3(4) |
| C(6)-C(7)-C(12)    | 122.5(4) |
| C(9)-C(8)-C(7)     | 121.9(4) |
| C(9)-C(8)-H(8)     | 119.0    |
| C(7)-C(8)-H(8)     | 119.0    |
| C(8)-C(9)-C(10)    | 119.9(4) |
| C(8)-C(9)-H(9)     | 120.0    |
| C(10)-C(9)-H(9)    | 120.0    |
| C(9)-C(10)-C(11)   | 121.1(4) |
| C(9)-C(10)-H(10)   | 119.4    |
| C(11)-C(10)-H(10)  | 119.4    |
| C(10)-C(11)-C(6)   | 118.0(4) |
| C(10)-C(11)-C(15)  | 119.6(4) |
| C(6)-C(11)-C(15)   | 122.4(4) |
| C(7)-C(12)-C(14)   | 111.6(4) |
| C(7)-C(12)-C(13)   | 111.3(4) |
| C(14)-C(12)-C(13)  | 110.7(4) |
| C(7)-C(12)-H(12)   | 107.7    |
| C(14)-C(12)-H(12)  | 107.7    |
| C(13)-C(12)-H(12)  | 107.7    |
| C(12)-C(13)-H(13A) | 109.5    |

|                     |          |
|---------------------|----------|
| C(12)-C(13)-H(13B)  | 109.5    |
| H(13A)-C(13)-H(13B) | 109.5    |
| C(12)-C(13)-H(13C)  | 109.5    |
| H(13A)-C(13)-H(13C) | 109.5    |
| H(13B)-C(13)-H(13C) | 109.5    |
| C(12)-C(14)-H(14A)  | 109.5    |
| C(12)-C(14)-H(14B)  | 109.5    |
| H(14A)-C(14)-H(14B) | 109.5    |
| C(12)-C(14)-H(14C)  | 109.5    |
| H(14A)-C(14)-H(14C) | 109.5    |
| H(14B)-C(14)-H(14C) | 109.5    |
| C(11)-C(15)-C(17)   | 113.4(4) |
| C(11)-C(15)-C(16)   | 109.7(3) |
| C(17)-C(15)-C(16)   | 110.2(3) |
| C(11)-C(15)-H(15)   | 107.8    |
| C(17)-C(15)-H(15)   | 107.8    |
| C(16)-C(15)-H(15)   | 107.8    |
| C(15)-C(16)-H(16A)  | 109.5    |
| C(15)-C(16)-H(16B)  | 109.5    |
| H(16A)-C(16)-H(16B) | 109.5    |
| C(15)-C(16)-H(16C)  | 109.5    |
| H(16A)-C(16)-H(16C) | 109.5    |
| H(16B)-C(16)-H(16C) | 109.5    |
| C(15)-C(17)-H(17A)  | 109.5    |
| C(15)-C(17)-H(17B)  | 109.5    |
| H(17A)-C(17)-H(17B) | 109.5    |
| C(15)-C(17)-H(17C)  | 109.5    |
| H(17A)-C(17)-H(17C) | 109.5    |
| H(17B)-C(17)-H(17C) | 109.5    |
| C(19)-C(18)-C(23)   | 121.9(4) |
| C(19)-C(18)-N(2)    | 120.2(3) |
| C(23)-C(18)-N(2)    | 117.9(4) |
| C(20)-C(19)-C(18)   | 117.5(4) |
| C(20)-C(19)-C(27)   | 119.5(4) |
| C(18)-C(19)-C(27)   | 123.0(4) |
| C(19)-C(20)-C(21)   | 121.8(4) |

|                     |          |
|---------------------|----------|
| C(19)-C(20)-H(20)   | 119.1    |
| C(21)-C(20)-H(20)   | 119.1    |
| C(22)-C(21)-C(20)   | 119.1(4) |
| C(22)-C(21)-H(21)   | 120.5    |
| C(20)-C(21)-H(21)   | 120.5    |
| C(23)-C(22)-C(21)   | 121.9(4) |
| C(23)-C(22)-H(22)   | 119.1    |
| C(21)-C(22)-H(22)   | 119.1    |
| C(22)-C(23)-C(18)   | 117.7(4) |
| C(22)-C(23)-C(24)   | 119.5(4) |
| C(18)-C(23)-C(24)   | 122.8(4) |
| C(25)-C(24)-C(23)   | 112.5(4) |
| C(25)-C(24)-C(26)   | 110.8(4) |
| C(23)-C(24)-C(26)   | 110.7(4) |
| C(25)-C(24)-H(24)   | 107.5    |
| C(23)-C(24)-H(24)   | 107.5    |
| C(26)-C(24)-H(24)   | 107.5    |
| C(24)-C(25)-H(25A)  | 109.5    |
| C(24)-C(25)-H(25B)  | 109.5    |
| H(25A)-C(25)-H(25B) | 109.5    |
| C(24)-C(25)-H(25C)  | 109.5    |
| H(25A)-C(25)-H(25C) | 109.5    |
| H(25B)-C(25)-H(25C) | 109.5    |
| C(24)-C(26)-H(26A)  | 109.5    |
| C(24)-C(26)-H(26B)  | 109.5    |
| H(26A)-C(26)-H(26B) | 109.5    |
| C(24)-C(26)-H(26C)  | 109.5    |
| H(26A)-C(26)-H(26C) | 109.5    |
| H(26B)-C(26)-H(26C) | 109.5    |
| C(19)-C(27)-C(29)   | 112.7(4) |
| C(19)-C(27)-C(28)   | 110.2(4) |
| C(29)-C(27)-C(28)   | 110.2(4) |
| C(19)-C(27)-H(27)   | 107.8    |
| C(29)-C(27)-H(27)   | 107.8    |
| C(28)-C(27)-H(27)   | 107.8    |
| C(27)-C(28)-H(28A)  | 109.5    |

|                     |          |
|---------------------|----------|
| C(27)-C(28)-H(28B)  | 109.5    |
| H(28A)-C(28)-H(28B) | 109.5    |
| C(27)-C(28)-H(28C)  | 109.5    |
| H(28A)-C(28)-H(28C) | 109.5    |
| H(28B)-C(28)-H(28C) | 109.5    |
| C(27)-C(29)-H(29A)  | 109.5    |
| C(27)-C(29)-H(29B)  | 109.5    |
| H(29A)-C(29)-H(29B) | 109.5    |
| C(27)-C(29)-H(29C)  | 109.5    |
| H(29A)-C(29)-H(29C) | 109.5    |
| H(29B)-C(29)-H(29C) | 109.5    |
| C(35)-C(30)-C(31)   | 119.7(4) |
| C(35)-C(30)-N(3)    | 120.4(4) |
| C(31)-C(30)-N(3)    | 119.8(4) |
| C(32)-C(31)-C(30)   | 118.4(4) |
| C(32)-C(31)-C(36)   | 119.6(4) |
| C(30)-C(31)-C(36)   | 122.0(4) |
| C(33)-C(32)-C(31)   | 121.7(4) |
| C(33)-C(32)-H(32)   | 119.1    |
| C(31)-C(32)-H(32)   | 119.1    |
| C(32)-C(33)-C(34)   | 119.6(4) |
| C(32)-C(33)-H(33)   | 120.2    |
| C(34)-C(33)-H(33)   | 120.2    |
| C(33)-C(34)-C(35)   | 121.3(4) |
| C(33)-C(34)-H(34)   | 119.4    |
| C(35)-C(34)-H(34)   | 119.4    |
| C(34)-C(35)-C(30)   | 119.2(4) |
| C(34)-C(35)-C(39)   | 118.6(4) |
| C(30)-C(35)-C(39)   | 122.2(4) |
| C(31)-C(36)-C(37)   | 112.2(4) |
| C(31)-C(36)-C(38)   | 111.0(4) |
| C(37)-C(36)-C(38)   | 109.5(4) |
| C(31)-C(36)-H(36)   | 108.0    |
| C(37)-C(36)-H(36)   | 108.0    |
| C(38)-C(36)-H(36)   | 108.0    |
| C(36)-C(37)-H(37A)  | 109.5    |



|                     |          |
|---------------------|----------|
| C(36)-C(37)-H(37B)  | 109.5    |
| H(37A)-C(37)-H(37B) | 109.5    |
| C(36)-C(37)-H(37C)  | 109.5    |
| H(37A)-C(37)-H(37C) | 109.5    |
| H(37B)-C(37)-H(37C) | 109.5    |
| C(36)-C(38)-H(38A)  | 109.5    |
| C(36)-C(38)-H(38B)  | 109.5    |
| H(38A)-C(38)-H(38B) | 109.5    |
| C(36)-C(38)-H(38C)  | 109.5    |
| H(38A)-C(38)-H(38C) | 109.5    |
| H(38B)-C(38)-H(38C) | 109.5    |
| C(40)-C(39)-C(41)   | 111.0(4) |
| C(40)-C(39)-C(35)   | 111.1(3) |
| C(41)-C(39)-C(35)   | 111.2(4) |
| C(40)-C(39)-H(39)   | 107.8    |
| C(41)-C(39)-H(39)   | 107.8    |
| C(35)-C(39)-H(39)   | 107.8    |
| C(39)-C(40)-H(40A)  | 109.5    |
| C(39)-C(40)-H(40B)  | 109.5    |
| H(40A)-C(40)-H(40B) | 109.5    |
| C(39)-C(40)-H(40C)  | 109.5    |
| H(40A)-C(40)-H(40C) | 109.5    |
| H(40B)-C(40)-H(40C) | 109.5    |
| C(39)-C(41)-H(41A)  | 109.5    |
| C(39)-C(41)-H(41B)  | 109.5    |
| H(41A)-C(41)-H(41B) | 109.5    |
| C(39)-C(41)-H(41C)  | 109.5    |
| H(41A)-C(41)-H(41C) | 109.5    |
| H(41B)-C(41)-H(41C) | 109.5    |
| C(43)-C(42)-C(47)   | 120.4(4) |
| C(43)-C(42)-N(4)    | 120.1(4) |
| C(47)-C(42)-N(4)    | 119.5(4) |
| C(44)-C(43)-C(42)   | 118.6(4) |
| C(44)-C(43)-C(48)   | 118.3(4) |
| C(42)-C(43)-C(48)   | 123.0(4) |
| C(45)-C(44)-C(43)   | 120.8(4) |

|                     |          |
|---------------------|----------|
| C(45)-C(44)-H(44)   | 119.6    |
| C(43)-C(44)-H(44)   | 119.6    |
| C(46)-C(45)-C(44)   | 120.2(4) |
| C(46)-C(45)-H(45)   | 119.9    |
| C(44)-C(45)-H(45)   | 119.9    |
| C(45)-C(46)-C(47)   | 121.5(4) |
| C(45)-C(46)-H(46)   | 119.2    |
| C(47)-C(46)-H(46)   | 119.2    |
| C(46)-C(47)-C(42)   | 118.4(4) |
| C(46)-C(47)-C(51)   | 119.1(4) |
| C(42)-C(47)-C(51)   | 122.5(4) |
| C(43)-C(48)-C(49)   | 113.0(4) |
| C(43)-C(48)-C(50)   | 110.6(4) |
| C(49)-C(48)-C(50)   | 110.7(4) |
| C(43)-C(48)-H(48)   | 107.4    |
| C(49)-C(48)-H(48)   | 107.4    |
| C(50)-C(48)-H(48)   | 107.4    |
| C(48)-C(49)-H(49A)  | 109.5    |
| C(48)-C(49)-H(49B)  | 109.5    |
| H(49A)-C(49)-H(49B) | 109.5    |
| C(48)-C(49)-H(49C)  | 109.5    |
| H(49A)-C(49)-H(49C) | 109.5    |
| H(49B)-C(49)-H(49C) | 109.5    |
| C(48)-C(50)-H(50A)  | 109.5    |
| C(48)-C(50)-H(50B)  | 109.5    |
| H(50A)-C(50)-H(50B) | 109.5    |
| C(48)-C(50)-H(50C)  | 109.5    |
| H(50A)-C(50)-H(50C) | 109.5    |
| H(50B)-C(50)-H(50C) | 109.5    |
| C(47)-C(51)-C(52)   | 110.9(4) |
| C(47)-C(51)-C(53)   | 111.9(4) |
| C(52)-C(51)-C(53)   | 110.0(4) |
| C(47)-C(51)-H(51)   | 108.0    |
| C(52)-C(51)-H(51)   | 108.0    |
| C(53)-C(51)-H(51)   | 108.0    |
| C(51)-C(52)-H(52A)  | 109.5    |

|                     |       |
|---------------------|-------|
| C(51)-C(52)-H(52B)  | 109.5 |
| H(52A)-C(52)-H(52B) | 109.5 |
| C(51)-C(52)-H(52C)  | 109.5 |
| H(52A)-C(52)-H(52C) | 109.5 |
| H(52B)-C(52)-H(52C) | 109.5 |
| C(51)-C(53)-H(53A)  | 109.5 |
| C(51)-C(53)-H(53B)  | 109.5 |
| H(53A)-C(53)-H(53B) | 109.5 |
| C(51)-C(53)-H(53C)  | 109.5 |
| H(53A)-C(53)-H(53C) | 109.5 |
| H(53B)-C(53)-H(53C) | 109.5 |

---

Symmetry transformations used to generate equivalent atoms:

Table 4. Anisotropic displacement parameters ( $\text{\AA}^2 \times 10^3$ ) for 2. The anisotropic displacement factor exponent takes the form:  $-2\pi^2 [ h^2 a^{*2} U^{11} + \dots + 2 h k a^* b^* U^{12} ]$

|       | $U^{11}$ | $U^{22}$ | $U^{33}$ | $U^{23}$ | $U^{13}$ | $U^{12}$ |
|-------|----------|----------|----------|----------|----------|----------|
| S(1)  | 37(1)    | 23(1)    | 34(1)    | 4(1)     | -1(1)    | -5(1)    |
| S(2)  | 46(1)    | 27(1)    | 68(1)    | 0(1)     | -24(1)   | 0(1)     |
| P(1)  | 26(1)    | 22(1)    | 22(1)    | -2(1)    | 2(1)     | -3(1)    |
| P(2)  | 25(1)    | 22(1)    | 29(1)    | 2(1)     | -2(1)    | -2(1)    |
| N(1)  | 25(2)    | 18(2)    | 19(2)    | -1(2)    | 0(2)     | -3(2)    |
| N(2)  | 27(2)    | 19(2)    | 22(2)    | -4(2)    | 3(2)     | -8(2)    |
| N(3)  | 21(2)    | 17(2)    | 36(2)    | 0(2)     | 4(2)     | 0(2)     |
| N(4)  | 23(2)    | 27(2)    | 26(2)    | 1(2)     | 3(2)     | -5(2)    |
| C(1)  | 34(3)    | 21(3)    | 28(2)    | -1(2)    | -4(2)    | -3(2)    |
| C(2)  | 51(3)    | 24(3)    | 27(3)    | -4(2)    | 7(2)     | -10(2)   |
| C(3)  | 41(3)    | 27(3)    | 27(3)    | -2(2)    | 4(2)     | -9(2)    |
| C(4)  | 23(2)    | 33(3)    | 56(3)    | -9(3)    | 14(2)    | -7(2)    |
| C(5)  | 42(3)    | 34(3)    | 42(3)    | 1(2)     | 11(2)    | -14(2)   |
| C(6)  | 26(2)    | 18(2)    | 16(2)    | 1(2)     | 0(2)     | -3(2)    |
| C(7)  | 23(2)    | 28(3)    | 25(2)    | 4(2)     | 3(2)     | 1(2)     |
| C(8)  | 20(2)    | 46(3)    | 28(3)    | 2(2)     | -4(2)    | -7(2)    |
| C(9)  | 31(3)    | 32(3)    | 26(3)    | -3(2)    | 0(2)     | -6(2)    |
| C(10) | 31(2)    | 23(3)    | 23(2)    | -2(2)    | 2(2)     | 0(2)     |
| C(11) | 28(2)    | 22(3)    | 19(2)    | 0(2)     | 2(2)     | -3(2)    |
| C(12) | 27(3)    | 57(4)    | 38(3)    | -9(3)    | -7(2)    | 12(2)    |
| C(13) | 97(5)    | 91(6)    | 70(4)    | 3(4)     | -13(4)   | 60(4)    |
| C(14) | 29(3)    | 101(5)   | 69(4)    | -21(4)   | 13(3)    | 3(3)     |
| C(15) | 27(2)    | 30(3)    | 29(3)    | -6(2)    | -3(2)    | 7(2)     |
| C(16) | 24(2)    | 54(4)    | 41(3)    | -13(3)   | 6(2)     | -1(2)    |
| C(17) | 42(3)    | 42(3)    | 52(3)    | -9(3)    | -7(2)    | 14(3)    |
| C(18) | 30(2)    | 16(3)    | 25(2)    | -3(2)    | 3(2)     | -6(2)    |
| C(19) | 31(2)    | 19(3)    | 29(3)    | -3(2)    | 0(2)     | -2(2)    |
| C(20) | 43(3)    | 34(3)    | 25(3)    | -3(2)    | -5(2)    | -2(2)    |
| C(21) | 54(3)    | 43(3)    | 27(3)    | -12(2)   | 6(2)     | 4(3)     |
| C(22) | 40(3)    | 29(3)    | 43(3)    | -9(2)    | 7(2)     | 4(2)     |
| C(23) | 33(3)    | 20(3)    | 24(2)    | -4(2)    | 2(2)     | -2(2)    |

|       |        |       |        |        |        |        |
|-------|--------|-------|--------|--------|--------|--------|
| C(24) | 32(3)  | 28(3) | 38(3)  | -9(2)  | 1(2)   | 5(2)   |
| C(25) | 36(3)  | 78(5) | 99(5)  | 22(4)  | -14(3) | -9(3)  |
| C(26) | 76(4)  | 38(4) | 86(4)  | 13(3)  | -20(3) | -6(3)  |
| C(27) | 32(3)  | 32(3) | 27(3)  | -2(2)  | -5(2)  | 1(2)   |
| C(28) | 37(3)  | 46(4) | 56(3)  | -15(3) | -1(2)  | -13(3) |
| C(29) | 45(3)  | 45(4) | 40(3)  | 0(3)   | 1(2)   | 8(3)   |
| C(30) | 20(2)  | 18(3) | 30(3)  | 1(2)   | 6(2)   | -7(2)  |
| C(31) | 22(2)  | 26(3) | 34(3)  | 5(2)   | -2(2)  | -5(2)  |
| C(32) | 38(3)  | 33(3) | 27(3)  | 2(2)   | -3(2)  | 2(2)   |
| C(33) | 39(3)  | 26(3) | 37(3)  | -7(2)  | 6(2)   | 0(2)   |
| C(34) | 35(3)  | 26(3) | 34(3)  | 2(2)   | 3(2)   | 5(2)   |
| C(35) | 25(2)  | 22(3) | 28(2)  | 0(2)   | 3(2)   | -4(2)  |
| C(36) | 30(3)  | 30(3) | 42(3)  | 5(2)   | -10(2) | -3(2)  |
| C(37) | 51(3)  | 74(5) | 72(4)  | 38(4)  | -2(3)  | 2(3)   |
| C(38) | 30(3)  | 59(4) | 78(4)  | 19(3)  | -9(3)  | -5(3)  |
| C(39) | 30(2)  | 28(3) | 26(2)  | 5(2)   | 3(2)   | 6(2)   |
| C(40) | 29(3)  | 56(4) | 33(3)  | 4(2)   | -5(2)  | -2(2)  |
| C(41) | 65(3)  | 39(3) | 37(3)  | 8(3)   | 5(3)   | -4(3)  |
| C(42) | 29(2)  | 23(3) | 22(2)  | 2(2)   | 4(2)   | 0(2)   |
| C(43) | 31(3)  | 30(3) | 25(3)  | 4(2)   | 5(2)   | -2(2)  |
| C(44) | 41(3)  | 35(3) | 30(3)  | 1(2)   | -1(2)  | 2(2)   |
| C(45) | 57(3)  | 31(3) | 33(3)  | -1(2)  | 6(3)   | 0(3)   |
| C(46) | 48(3)  | 30(3) | 36(3)  | 0(2)   | 16(2)  | 10(2)  |
| C(47) | 34(3)  | 27(3) | 32(3)  | 5(2)   | 12(2)  | 5(2)   |
| C(48) | 29(2)  | 31(3) | 29(3)  | -5(2)  | -4(2)  | 2(2)   |
| C(49) | 39(3)  | 52(4) | 106(5) | -35(4) | 11(3)  | -7(3)  |
| C(50) | 100(5) | 68(5) | 70(4)  | 25(4)  | 33(4)  | 49(4)  |
| C(51) | 31(3)  | 34(3) | 42(3)  | 3(2)   | 11(2)  | 10(2)  |
| C(52) | 41(3)  | 52(4) | 64(4)  | 14(3)  | 12(3)  | 5(3)   |
| C(53) | 47(3)  | 52(4) | 50(3)  | 20(3)  | 15(3)  | 12(3)  |

---

Table 5. Hydrogen coordinates ( $\times 10^4$ ) and isotropic displacement parameters ( $\text{\AA}^2 \times 10^{-3}$ ) for 2.

|        | x    | y     | z    | U(eq) |
|--------|------|-------|------|-------|
| H(2A)  | 1633 | -2313 | 4096 | 41    |
| H(2B)  | 2443 | -2901 | 4011 | 41    |
| H(3A)  | 1751 | -3431 | 3168 | 38    |
| H(3B)  | 1173 | -2543 | 3114 | 38    |
| H(4A)  | 3749 | 2469  | 2263 | 44    |
| H(4B)  | 3339 | 3393  | 1988 | 44    |
| H(5A)  | 2860 | 2704  | 1113 | 47    |
| H(5B)  | 3599 | 2010  | 1270 | 47    |
| H(8)   | 4384 | -440  | 5086 | 38    |
| H(9)   | 3498 | 613   | 5462 | 36    |
| H(10)  | 2154 | 639   | 5088 | 31    |
| H(12)  | 3880 | -2169 | 3942 | 49    |
| H(13A) | 4883 | -1863 | 5054 | 130   |
| H(13B) | 4981 | -2717 | 4599 | 130   |
| H(13C) | 4179 | -2614 | 4978 | 130   |
| H(14A) | 4563 | -965  | 3478 | 99    |
| H(14B) | 5205 | -1738 | 3696 | 99    |
| H(14C) | 5132 | -822  | 4097 | 99    |
| H(15)  | 1283 | -758  | 3852 | 35    |
| H(16A) | 1010 | -1427 | 4814 | 59    |
| H(16B) | 261  | -789  | 4590 | 59    |
| H(16C) | 906  | -439  | 5121 | 59    |
| H(17A) | 1052 | 977   | 4437 | 68    |
| H(17B) | 474  | 550   | 3889 | 68    |
| H(17C) | 1376 | 864   | 3754 | 68    |
| H(20)  | 1474 | -2662 | 729  | 41    |
| H(21)  | 2675 | -3391 | 494  | 49    |
| H(22)  | 3625 | -3761 | 1292 | 44    |
| H(24)  | 3479 | -3254 | 2910 | 40    |
| H(25A) | 4715 | -3331 | 2039 | 107   |

|        |      |       |      |     |
|--------|------|-------|------|-----|
| H(25B) | 4863 | -3239 | 2777 | 107 |
| H(25C) | 4454 | -2415 | 2383 | 107 |
| H(26A) | 3167 | -4774 | 2605 | 101 |
| H(26B) | 4075 | -4703 | 2902 | 101 |
| H(26C) | 3916 | -4774 | 2163 | 101 |
| H(27)  | 985  | -1802 | 2217 | 37  |
| H(28A) | 202  | -3048 | 1346 | 70  |
| H(28B) | -265 | -2466 | 1844 | 70  |
| H(28C) | 368  | -3241 | 2074 | 70  |
| H(29A) | 1174 | -832  | 1347 | 65  |
| H(29B) | 233  | -957  | 1472 | 65  |
| H(29C) | 621  | -1507 | 918  | 65  |
| H(32)  | 2424 | 4200  | 4157 | 40  |
| H(33)  | 1372 | 5110  | 3753 | 41  |
| H(34)  | 891  | 4926  | 2727 | 38  |
| H(36)  | 3357 | 2348  | 3370 | 41  |
| H(37A) | 2954 | 2895  | 4591 | 99  |
| H(37B) | 3502 | 2029  | 4438 | 99  |
| H(37C) | 2558 | 2038  | 4224 | 99  |
| H(38A) | 4141 | 3709  | 3366 | 84  |
| H(38B) | 4466 | 3040  | 3914 | 84  |
| H(38C) | 3925 | 3912  | 4069 | 84  |
| H(39)  | 1583 | 3280  | 1648 | 33  |
| H(40A) | 86   | 4045  | 2005 | 60  |
| H(40B) | 304  | 2978  | 2027 | 60  |
| H(40C) | 198  | 3496  | 1372 | 60  |
| H(41A) | 1162 | 5177  | 1675 | 71  |
| H(41B) | 1257 | 4591  | 1055 | 71  |
| H(41C) | 2034 | 4793  | 1513 | 71  |
| H(44)  | 897  | 293   | -10  | 43  |
| H(45)  | 1809 | -867  | -191 | 48  |
| H(46)  | 3049 | -924  | 360  | 45  |
| H(48)  | 1166 | 2043  | 1143 | 36  |
| H(49A) | -77  | 987   | 517  | 98  |
| H(49B) | -226 | 1856  | 950  | 98  |
| H(49C) | 156  | 938   | 1249 | 98  |

|        |      |       |      |     |
|--------|------|-------|------|-----|
| H(50A) | 1496 | 2584  | 172  | 117 |
| H(50B) | 567  | 2818  | 277  | 117 |
| H(50C) | 788  | 1984  | -164 | 117 |
| H(51)  | 3722 | 572   | 1600 | 43  |
| H(52A) | 4407 | -116  | 498  | 78  |
| H(52B) | 4902 | 380   | 1063 | 78  |
| H(52C) | 4267 | 950   | 626  | 78  |
| H(53A) | 3411 | -993  | 1803 | 74  |
| H(53B) | 4369 | -833  | 1792 | 74  |
| H(53C) | 3884 | -1291 | 1206 | 74  |

---



### Crystallography tables for compound 3

Table 1. Crystal data and structure refinement for 3.

|                                   |                                                               |                  |
|-----------------------------------|---------------------------------------------------------------|------------------|
| Identification code               | NG122_0m                                                      |                  |
| Empirical formula                 | C <sub>59</sub> H <sub>81</sub> N <sub>5</sub> O <sub>2</sub> |                  |
| Formula weight                    | 938.22                                                        |                  |
| Temperature                       | 130(2) K                                                      |                  |
| Wavelength                        | 0.71073 Å                                                     |                  |
| Crystal system                    | Monoclinic                                                    |                  |
| Space group                       | C2/c                                                          |                  |
| Unit cell dimensions              | a = 29.594(7) Å                                               | α = 90°.         |
|                                   | b = 19.280(5) Å                                               | β = 112.239(3)°. |
|                                   | c = 22.869(6) Å                                               | γ = 90°.         |
| Volume                            | 12078(5) Å <sup>3</sup>                                       |                  |
| Z                                 | 8                                                             |                  |
| Density (calculated)              | 1.032 Mg/m <sup>3</sup>                                       |                  |
| Absorption coefficient            | 0.111 mm <sup>-1</sup>                                        |                  |
| F(000)                            | 4064                                                          |                  |
| Crystal size                      | 0.237 x 0.154 x 0.094 mm <sup>3</sup>                         |                  |
| Theta range for data collection   | 1.936 to 24.997°.                                             |                  |
| Index ranges                      | -35 ≤ h ≤ 35, -22 ≤ k ≤ 22, -25 ≤ l ≤ 27                      |                  |
| Reflections collected             | 39221                                                         |                  |
| Independent reflections           | 10618 [R(int) = 0.0809]                                       |                  |
| Completeness to theta = 24.997°   | 99.9 %                                                        |                  |
| Absorption correction             | Semi-empirical from equivalents                               |                  |
| Max. and min. transmission        | 0.7457 and 0.6802                                             |                  |
| Refinement method                 | Full-matrix least-squares on F <sup>2</sup>                   |                  |
| Data / restraints / parameters    | 10618 / 0 / 620                                               |                  |
| Goodness-of-fit on F <sup>2</sup> | 0.921                                                         |                  |
| Final R indices [I > 2σ(I)]       | R1 = 0.0560, wR2 = 0.1218                                     |                  |
| R indices (all data)              | R1 = 0.1020, wR2 = 0.1368                                     |                  |
| Extinction coefficient            | n/a                                                           |                  |
| Largest diff. peak and hole       | 0.226 and -0.297 e.Å <sup>-3</sup>                            |                  |

Table 2. Atomic coordinates ( $\times 10^4$ ) and equivalent isotropic displacement parameters ( $\text{\AA}^2 \times 10^3$ ) for 3.  $U(\text{eq})$  is defined as one third of the trace of the orthogonalized  $U^{ij}$  tensor.

|       | x       | y        | z        | $U(\text{eq})$ |
|-------|---------|----------|----------|----------------|
| P(1)  | 1432(1) | 10240(1) | 1114(1)  | 27(1)          |
| P(2)  | 2858(1) | 9516(1)  | 1212(1)  | 27(1)          |
| O(1)  | 1846(1) | 9710(1)  | 941(1)   | 27(1)          |
| N(1)  | 2315(1) | 10647(1) | 1328(1)  | 31(1)          |
| N(2)  | 1228(1) | 10752(1) | 462(1)   | 27(1)          |
| N(3)  | 933(1)  | 9742(1)  | 816(1)   | 25(1)          |
| N(4)  | 2656(1) | 8890(1)  | 657(1)   | 28(1)          |
| N(5)  | 2908(1) | 8933(1)  | 1793(1)  | 28(1)          |
| C(1)  | 2298(1) | 10007(1) | 1170(1)  | 27(1)          |
| C(2)  | 2761(1) | 10998(1) | 1637(1)  | 33(1)          |
| C(3)  | 3031(1) | 10871(1) | 2268(1)  | 38(1)          |
| C(4)  | 3452(1) | 11249(2) | 2584(1)  | 45(1)          |
| C(5)  | 3606(1) | 11753(2) | 2278(2)  | 49(1)          |
| C(6)  | 3335(1) | 11882(2) | 1650(2)  | 51(1)          |
| C(7)  | 2909(1) | 11520(2) | 1334(1)  | 43(1)          |
| C(8)  | 740(1)  | 10570(1) | 3(1)     | 30(1)          |
| C(9)  | 675(1)  | 9815(1)  | 132(1)   | 28(1)          |
| C(10) | 2475(1) | 8273(1)  | 888(1)   | 31(1)          |
| C(11) | 2797(1) | 8220(1)  | 1583(1)  | 30(1)          |
| C(12) | 1439(1) | 11401(1) | 391(1)   | 29(1)          |
| C(13) | 1442(1) | 11967(1) | 778(1)   | 34(1)          |
| C(14) | 1640(1) | 12590(2) | 679(2)   | 43(1)          |
| C(15) | 1831(1) | 12656(2) | 218(2)   | 43(1)          |
| C(16) | 1831(1) | 12090(1) | -157(1)  | 36(1)          |
| C(17) | 1638(1) | 11461(1) | -74(1)   | 30(1)          |
| C(18) | 1652(1) | 10852(1) | -492(1)  | 33(1)          |
| C(19) | 1332(1) | 10989(2) | -1186(1) | 45(1)          |
| C(20) | 2181(1) | 10691(2) | -421(1)  | 42(1)          |
| C(21) | 1237(1) | 11931(2) | 1291(1)  | 39(1)          |
| C(22) | 784(1)  | 12387(2) | 1133(2)  | 64(1)          |
| C(23) | 1623(1) | 12107(2) | 1937(2)  | 60(1)          |

|       |         |          |          |       |
|-------|---------|----------|----------|-------|
| C(24) | 759(1)  | 9320(1)  | 1205(1)  | 31(1) |
| C(25) | 776(1)  | 8595(2)  | 1162(1)  | 37(1) |
| C(26) | 613(1)  | 8202(2)  | 1552(2)  | 58(1) |
| C(27) | 458(1)  | 8507(2)  | 1984(2)  | 67(1) |
| C(28) | 440(1)  | 9213(2)  | 2019(2)  | 53(1) |
| C(29) | 579(1)  | 9638(2)  | 1627(1)  | 35(1) |
| C(30) | 522(1)  | 10419(1) | 1661(1)  | 34(1) |
| C(31) | 871(1)  | 10714(2) | 2289(1)  | 47(1) |
| C(32) | -5(1)   | 10612(2) | 1555(1)  | 47(1) |
| C(33) | 956(1)  | 8234(1)  | 704(1)   | 36(1) |
| C(34) | 1295(1) | 7625(2)  | 1012(2)  | 50(1) |
| C(35) | 517(1)  | 7979(2)  | 126(2)   | 50(1) |
| C(36) | 2670(1) | 8893(1)  | 37(1)    | 31(1) |
| C(37) | 2249(1) | 8707(1)  | -488(1)  | 33(1) |
| C(38) | 2279(1) | 8644(1)  | -1080(1) | 41(1) |
| C(39) | 2709(1) | 8798(2)  | -1165(2) | 48(1) |
| C(40) | 3112(1) | 9011(2)  | -657(2)  | 44(1) |
| C(41) | 3111(1) | 9054(1)  | -46(1)   | 36(1) |
| C(42) | 3577(1) | 9288(2)  | 476(1)   | 40(1) |
| C(43) | 4030(1) | 8900(2)  | 478(2)   | 66(1) |
| C(44) | 3640(1) | 10074(2) | 449(2)   | 58(1) |
| C(45) | 1751(1) | 8583(1)  | -452(1)  | 35(1) |
| C(46) | 1346(1) | 8981(2)  | -968(1)  | 50(1) |
| C(47) | 1612(1) | 7819(2)  | -507(1)  | 43(1) |
| C(48) | 3168(1) | 9076(1)  | 2450(1)  | 28(1) |
| C(49) | 3679(1) | 9151(1)  | 2691(1)  | 34(1) |
| C(50) | 3914(1) | 9314(2)  | 3327(1)  | 39(1) |
| C(51) | 3662(1) | 9391(2)  | 3715(1)  | 38(1) |
| C(52) | 3160(1) | 9299(1)  | 3480(1)  | 32(1) |
| C(53) | 2904(1) | 9139(1)  | 2846(1)  | 28(1) |
| C(54) | 2354(1) | 9032(1)  | 2599(1)  | 32(1) |
| C(55) | 2091(1) | 9644(2)  | 2757(1)  | 40(1) |
| C(56) | 2225(1) | 8361(2)  | 2855(1)  | 43(1) |
| C(57) | 3975(1) | 9051(2)  | 2281(1)  | 41(1) |
| C(58) | 4240(1) | 9715(2)  | 2235(2)  | 63(1) |
| C(59) | 4330(1) | 8443(2)  | 2509(2)  | 67(1) |



Table 3. Bond lengths [ $\text{\AA}$ ] and angles [ $^\circ$ ] for 3.

---

|             |            |
|-------------|------------|
| P(1)-N(3)   | 1.675(2)   |
| P(1)-N(2)   | 1.697(2)   |
| P(1)-O(1)   | 1.7510(17) |
| P(2)-N(4)   | 1.688(2)   |
| P(2)-N(5)   | 1.702(2)   |
| P(2)-C(1)   | 1.881(3)   |
| O(1)-C(1)   | 1.363(3)   |
| N(1)-C(1)   | 1.281(3)   |
| N(1)-C(2)   | 1.412(3)   |
| N(2)-C(12)  | 1.435(3)   |
| N(2)-C(8)   | 1.470(3)   |
| N(3)-C(24)  | 1.439(3)   |
| N(3)-C(9)   | 1.463(3)   |
| N(4)-C(36)  | 1.434(3)   |
| N(4)-C(10)  | 1.481(3)   |
| N(5)-C(48)  | 1.433(3)   |
| N(5)-C(11)  | 1.451(3)   |
| C(2)-C(3)   | 1.382(4)   |
| C(2)-C(7)   | 1.384(4)   |
| C(3)-C(4)   | 1.385(4)   |
| C(3)-H(3)   | 0.9500     |
| C(4)-C(5)   | 1.373(4)   |
| C(4)-H(4)   | 0.9500     |
| C(5)-C(6)   | 1.376(4)   |
| C(5)-H(5)   | 0.9500     |
| C(6)-C(7)   | 1.382(4)   |
| C(6)-H(6)   | 0.9500     |
| C(7)-H(7)   | 0.9500     |
| C(8)-C(9)   | 1.513(3)   |
| C(8)-H(8A)  | 0.9900     |
| C(8)-H(8B)  | 0.9900     |
| C(9)-H(9A)  | 0.9900     |
| C(9)-H(9B)  | 0.9900     |
| C(10)-C(11) | 1.517(3)   |

|              |          |
|--------------|----------|
| C(10)-H(10A) | 0.9900   |
| C(10)-H(10B) | 0.9900   |
| C(11)-H(11A) | 0.9900   |
| C(11)-H(11B) | 0.9900   |
| C(12)-C(13)  | 1.403(4) |
| C(12)-C(17)  | 1.403(4) |
| C(13)-C(14)  | 1.393(4) |
| C(13)-C(21)  | 1.511(4) |
| C(14)-C(15)  | 1.378(4) |
| C(14)-H(14)  | 0.9500   |
| C(15)-C(16)  | 1.387(4) |
| C(15)-H(15)  | 0.9500   |
| C(16)-C(17)  | 1.383(4) |
| C(16)-H(16)  | 0.9500   |
| C(17)-C(18)  | 1.524(4) |
| C(18)-C(19)  | 1.532(4) |
| C(18)-C(20)  | 1.544(4) |
| C(18)-H(18)  | 1.0000   |
| C(19)-H(19A) | 0.9800   |
| C(19)-H(19B) | 0.9800   |
| C(19)-H(19C) | 0.9800   |
| C(20)-H(20A) | 0.9800   |
| C(20)-H(20B) | 0.9800   |
| C(20)-H(20C) | 0.9800   |
| C(21)-C(23)  | 1.525(4) |
| C(21)-C(22)  | 1.529(4) |
| C(21)-H(21)  | 1.0000   |
| C(22)-H(22A) | 0.9800   |
| C(22)-H(22B) | 0.9800   |
| C(22)-H(22C) | 0.9800   |
| C(23)-H(23A) | 0.9800   |
| C(23)-H(23B) | 0.9800   |
| C(23)-H(23C) | 0.9800   |
| C(24)-C(25)  | 1.403(4) |
| C(24)-C(29)  | 1.406(4) |
| C(25)-C(26)  | 1.388(4) |

|              |          |
|--------------|----------|
| C(25)-C(33)  | 1.513(4) |
| C(26)-C(27)  | 1.370(4) |
| C(26)-H(26)  | 0.9500   |
| C(27)-C(28)  | 1.366(4) |
| C(27)-H(27)  | 0.9500   |
| C(28)-C(29)  | 1.386(4) |
| C(28)-H(28)  | 0.9500   |
| C(29)-C(30)  | 1.521(4) |
| C(30)-C(31)  | 1.526(4) |
| C(30)-C(32)  | 1.531(3) |
| C(30)-H(30)  | 1.0000   |
| C(31)-H(31A) | 0.9800   |
| C(31)-H(31B) | 0.9800   |
| C(31)-H(31C) | 0.9800   |
| C(32)-H(32A) | 0.9800   |
| C(32)-H(32B) | 0.9800   |
| C(32)-H(32C) | 0.9800   |
| C(33)-C(34)  | 1.532(4) |
| C(33)-C(35)  | 1.542(4) |
| C(33)-H(33)  | 1.0000   |
| C(34)-H(34A) | 0.9800   |
| C(34)-H(34B) | 0.9800   |
| C(34)-H(34C) | 0.9800   |
| C(35)-H(35A) | 0.9800   |
| C(35)-H(35B) | 0.9800   |
| C(35)-H(35C) | 0.9800   |
| C(36)-C(37)  | 1.409(4) |
| C(36)-C(41)  | 1.424(4) |
| C(37)-C(38)  | 1.395(4) |
| C(37)-C(45)  | 1.526(4) |
| C(38)-C(39)  | 1.389(4) |
| C(38)-H(38)  | 0.9500   |
| C(39)-C(40)  | 1.375(4) |
| C(39)-H(39)  | 0.9500   |
| C(40)-C(41)  | 1.399(4) |
| C(40)-H(40)  | 0.9500   |

|              |          |
|--------------|----------|
| C(41)-C(42)  | 1.511(4) |
| C(42)-C(44)  | 1.531(4) |
| C(42)-C(43)  | 1.534(4) |
| C(42)-H(42)  | 1.0000   |
| C(43)-H(43A) | 0.9800   |
| C(43)-H(43B) | 0.9800   |
| C(43)-H(43C) | 0.9800   |
| C(44)-H(44A) | 0.9800   |
| C(44)-H(44B) | 0.9800   |
| C(44)-H(44C) | 0.9800   |
| C(45)-C(47)  | 1.521(4) |
| C(45)-C(46)  | 1.534(4) |
| C(45)-H(45)  | 1.0000   |
| C(46)-H(46A) | 0.9800   |
| C(46)-H(46B) | 0.9800   |
| C(46)-H(46C) | 0.9800   |
| C(47)-H(47A) | 0.9800   |
| C(47)-H(47B) | 0.9800   |
| C(47)-H(47C) | 0.9800   |
| C(48)-C(53)  | 1.407(3) |
| C(48)-C(49)  | 1.407(3) |
| C(49)-C(50)  | 1.390(4) |
| C(49)-C(57)  | 1.519(4) |
| C(50)-C(51)  | 1.365(4) |
| C(50)-H(50)  | 0.9500   |
| C(51)-C(52)  | 1.387(4) |
| C(51)-H(51)  | 0.9500   |
| C(52)-C(53)  | 1.392(4) |
| C(52)-H(52)  | 0.9500   |
| C(53)-C(54)  | 1.524(3) |
| C(54)-C(56)  | 1.527(4) |
| C(54)-C(55)  | 1.530(4) |
| C(54)-H(54)  | 1.0000   |
| C(55)-H(55A) | 0.9800   |
| C(55)-H(55B) | 0.9800   |
| C(55)-H(55C) | 0.9800   |



|                  |            |
|------------------|------------|
| C(56)-H(56A)     | 0.9800     |
| C(56)-H(56B)     | 0.9800     |
| C(56)-H(56C)     | 0.9800     |
| C(57)-C(58)      | 1.526(4)   |
| C(57)-C(59)      | 1.527(4)   |
| C(57)-H(57)      | 1.0000     |
| C(58)-H(58A)     | 0.9800     |
| C(58)-H(58B)     | 0.9800     |
| C(58)-H(58C)     | 0.9800     |
| C(59)-H(59A)     | 0.9800     |
| C(59)-H(59B)     | 0.9800     |
| C(59)-H(59C)     | 0.9800     |
|                  |            |
| N(3)-P(1)-N(2)   | 90.55(10)  |
| N(3)-P(1)-O(1)   | 99.12(9)   |
| N(2)-P(1)-O(1)   | 100.89(9)  |
| N(4)-P(2)-N(5)   | 90.89(11)  |
| N(4)-P(2)-C(1)   | 105.44(11) |
| N(5)-P(2)-C(1)   | 100.76(11) |
| C(1)-O(1)-P(1)   | 109.61(15) |
| C(1)-N(1)-C(2)   | 122.2(2)   |
| C(12)-N(2)-C(8)  | 118.65(19) |
| C(12)-N(2)-P(1)  | 125.51(17) |
| C(8)-N(2)-P(1)   | 114.54(16) |
| C(24)-N(3)-C(9)  | 123.4(2)   |
| C(24)-N(3)-P(1)  | 122.68(17) |
| C(9)-N(3)-P(1)   | 113.79(16) |
| C(36)-N(4)-C(10) | 120.3(2)   |
| C(36)-N(4)-P(2)  | 127.26(18) |
| C(10)-N(4)-P(2)  | 112.32(16) |
| C(48)-N(5)-C(11) | 119.48(19) |
| C(48)-N(5)-P(2)  | 123.00(17) |
| C(11)-N(5)-P(2)  | 115.20(17) |
| N(1)-C(1)-O(1)   | 116.2(2)   |
| N(1)-C(1)-P(2)   | 122.01(19) |
| O(1)-C(1)-P(2)   | 121.68(19) |

|                     |            |
|---------------------|------------|
| C(3)-C(2)-C(7)      | 119.0(3)   |
| C(3)-C(2)-N(1)      | 120.1(3)   |
| C(7)-C(2)-N(1)      | 120.6(3)   |
| C(2)-C(3)-C(4)      | 120.1(3)   |
| C(2)-C(3)-H(3)      | 120.0      |
| C(4)-C(3)-H(3)      | 120.0      |
| C(5)-C(4)-C(3)      | 120.9(3)   |
| C(5)-C(4)-H(4)      | 119.5      |
| C(3)-C(4)-H(4)      | 119.5      |
| C(4)-C(5)-C(6)      | 119.0(3)   |
| C(4)-C(5)-H(5)      | 120.5      |
| C(6)-C(5)-H(5)      | 120.5      |
| C(5)-C(6)-C(7)      | 120.8(3)   |
| C(5)-C(6)-H(6)      | 119.6      |
| C(7)-C(6)-H(6)      | 119.6      |
| C(6)-C(7)-C(2)      | 120.2(3)   |
| C(6)-C(7)-H(7)      | 119.9      |
| C(2)-C(7)-H(7)      | 119.9      |
| N(2)-C(8)-C(9)      | 104.7(2)   |
| N(2)-C(8)-H(8A)     | 110.8      |
| C(9)-C(8)-H(8A)     | 110.8      |
| N(2)-C(8)-H(8B)     | 110.8      |
| C(9)-C(8)-H(8B)     | 110.8      |
| H(8A)-C(8)-H(8B)    | 108.9      |
| N(3)-C(9)-C(8)      | 104.29(19) |
| N(3)-C(9)-H(9A)     | 110.9      |
| C(8)-C(9)-H(9A)     | 110.9      |
| N(3)-C(9)-H(9B)     | 110.9      |
| C(8)-C(9)-H(9B)     | 110.9      |
| H(9A)-C(9)-H(9B)    | 108.9      |
| N(4)-C(10)-C(11)    | 105.0(2)   |
| N(4)-C(10)-H(10A)   | 110.8      |
| C(11)-C(10)-H(10A)  | 110.8      |
| N(4)-C(10)-H(10B)   | 110.8      |
| C(11)-C(10)-H(10B)  | 110.8      |
| H(10A)-C(10)-H(10B) | 108.8      |

|                     |          |
|---------------------|----------|
| N(5)-C(11)-C(10)    | 104.9(2) |
| N(5)-C(11)-H(11A)   | 110.8    |
| C(10)-C(11)-H(11A)  | 110.8    |
| N(5)-C(11)-H(11B)   | 110.8    |
| C(10)-C(11)-H(11B)  | 110.8    |
| H(11A)-C(11)-H(11B) | 108.8    |
| C(13)-C(12)-C(17)   | 120.7(2) |
| C(13)-C(12)-N(2)    | 120.4(2) |
| C(17)-C(12)-N(2)    | 118.9(2) |
| C(14)-C(13)-C(12)   | 118.1(3) |
| C(14)-C(13)-C(21)   | 118.9(3) |
| C(12)-C(13)-C(21)   | 123.1(3) |
| C(15)-C(14)-C(13)   | 121.6(3) |
| C(15)-C(14)-H(14)   | 119.2    |
| C(13)-C(14)-H(14)   | 119.2    |
| C(14)-C(15)-C(16)   | 119.8(3) |
| C(14)-C(15)-H(15)   | 120.1    |
| C(16)-C(15)-H(15)   | 120.1    |
| C(17)-C(16)-C(15)   | 120.5(3) |
| C(17)-C(16)-H(16)   | 119.7    |
| C(15)-C(16)-H(16)   | 119.7    |
| C(16)-C(17)-C(12)   | 119.3(3) |
| C(16)-C(17)-C(18)   | 118.7(2) |
| C(12)-C(17)-C(18)   | 122.0(2) |
| C(17)-C(18)-C(19)   | 111.4(2) |
| C(17)-C(18)-C(20)   | 110.9(2) |
| C(19)-C(18)-C(20)   | 110.3(2) |
| C(17)-C(18)-H(18)   | 108.1    |
| C(19)-C(18)-H(18)   | 108.1    |
| C(20)-C(18)-H(18)   | 108.1    |
| C(18)-C(19)-H(19A)  | 109.5    |
| C(18)-C(19)-H(19B)  | 109.5    |
| H(19A)-C(19)-H(19B) | 109.5    |
| C(18)-C(19)-H(19C)  | 109.5    |
| H(19A)-C(19)-H(19C) | 109.5    |
| H(19B)-C(19)-H(19C) | 109.5    |

|                     |          |
|---------------------|----------|
| C(18)-C(20)-H(20A)  | 109.5    |
| C(18)-C(20)-H(20B)  | 109.5    |
| H(20A)-C(20)-H(20B) | 109.5    |
| C(18)-C(20)-H(20C)  | 109.5    |
| H(20A)-C(20)-H(20C) | 109.5    |
| H(20B)-C(20)-H(20C) | 109.5    |
| C(13)-C(21)-C(23)   | 111.6(2) |
| C(13)-C(21)-C(22)   | 111.4(3) |
| C(23)-C(21)-C(22)   | 111.7(3) |
| C(13)-C(21)-H(21)   | 107.3    |
| C(23)-C(21)-H(21)   | 107.3    |
| C(22)-C(21)-H(21)   | 107.3    |
| C(21)-C(22)-H(22A)  | 109.5    |
| C(21)-C(22)-H(22B)  | 109.5    |
| H(22A)-C(22)-H(22B) | 109.5    |
| C(21)-C(22)-H(22C)  | 109.5    |
| H(22A)-C(22)-H(22C) | 109.5    |
| H(22B)-C(22)-H(22C) | 109.5    |
| C(21)-C(23)-H(23A)  | 109.5    |
| C(21)-C(23)-H(23B)  | 109.5    |
| H(23A)-C(23)-H(23B) | 109.5    |
| C(21)-C(23)-H(23C)  | 109.5    |
| H(23A)-C(23)-H(23C) | 109.5    |
| H(23B)-C(23)-H(23C) | 109.5    |
| C(25)-C(24)-C(29)   | 121.0(3) |
| C(25)-C(24)-N(3)    | 119.2(2) |
| C(29)-C(24)-N(3)    | 119.7(2) |
| C(26)-C(25)-C(24)   | 117.9(3) |
| C(26)-C(25)-C(33)   | 119.5(3) |
| C(24)-C(25)-C(33)   | 122.6(3) |
| C(27)-C(26)-C(25)   | 121.4(3) |
| C(27)-C(26)-H(26)   | 119.3    |
| C(25)-C(26)-H(26)   | 119.3    |
| C(28)-C(27)-C(26)   | 120.1(3) |
| C(28)-C(27)-H(27)   | 120.0    |
| C(26)-C(27)-H(27)   | 120.0    |

|                     |          |
|---------------------|----------|
| C(27)-C(28)-C(29)   | 121.5(3) |
| C(27)-C(28)-H(28)   | 119.2    |
| C(29)-C(28)-H(28)   | 119.2    |
| C(28)-C(29)-C(24)   | 117.9(3) |
| C(28)-C(29)-C(30)   | 119.1(3) |
| C(24)-C(29)-C(30)   | 123.0(2) |
| C(29)-C(30)-C(31)   | 111.6(2) |
| C(29)-C(30)-C(32)   | 111.0(2) |
| C(31)-C(30)-C(32)   | 110.2(2) |
| C(29)-C(30)-H(30)   | 107.9    |
| C(31)-C(30)-H(30)   | 107.9    |
| C(32)-C(30)-H(30)   | 107.9    |
| C(30)-C(31)-H(31A)  | 109.5    |
| C(30)-C(31)-H(31B)  | 109.5    |
| H(31A)-C(31)-H(31B) | 109.5    |
| C(30)-C(31)-H(31C)  | 109.5    |
| H(31A)-C(31)-H(31C) | 109.5    |
| H(31B)-C(31)-H(31C) | 109.5    |
| C(30)-C(32)-H(32A)  | 109.5    |
| C(30)-C(32)-H(32B)  | 109.5    |
| H(32A)-C(32)-H(32B) | 109.5    |
| C(30)-C(32)-H(32C)  | 109.5    |
| H(32A)-C(32)-H(32C) | 109.5    |
| H(32B)-C(32)-H(32C) | 109.5    |
| C(25)-C(33)-C(34)   | 112.1(2) |
| C(25)-C(33)-C(35)   | 109.7(2) |
| C(34)-C(33)-C(35)   | 110.0(2) |
| C(25)-C(33)-H(33)   | 108.3    |
| C(34)-C(33)-H(33)   | 108.3    |
| C(35)-C(33)-H(33)   | 108.3    |
| C(33)-C(34)-H(34A)  | 109.5    |
| C(33)-C(34)-H(34B)  | 109.5    |
| H(34A)-C(34)-H(34B) | 109.5    |
| C(33)-C(34)-H(34C)  | 109.5    |
| H(34A)-C(34)-H(34C) | 109.5    |
| H(34B)-C(34)-H(34C) | 109.5    |

|                     |          |
|---------------------|----------|
| C(33)-C(35)-H(35A)  | 109.5    |
| C(33)-C(35)-H(35B)  | 109.5    |
| H(35A)-C(35)-H(35B) | 109.5    |
| C(33)-C(35)-H(35C)  | 109.5    |
| H(35A)-C(35)-H(35C) | 109.5    |
| H(35B)-C(35)-H(35C) | 109.5    |
| C(37)-C(36)-C(41)   | 120.0(2) |
| C(37)-C(36)-N(4)    | 119.6(2) |
| C(41)-C(36)-N(4)    | 120.3(2) |
| C(38)-C(37)-C(36)   | 119.3(3) |
| C(38)-C(37)-C(45)   | 117.1(3) |
| C(36)-C(37)-C(45)   | 123.6(2) |
| C(39)-C(38)-C(37)   | 121.0(3) |
| C(39)-C(38)-H(38)   | 119.5    |
| C(37)-C(38)-H(38)   | 119.5    |
| C(40)-C(39)-C(38)   | 119.5(3) |
| C(40)-C(39)-H(39)   | 120.3    |
| C(38)-C(39)-H(39)   | 120.3    |
| C(39)-C(40)-C(41)   | 122.2(3) |
| C(39)-C(40)-H(40)   | 118.9    |
| C(41)-C(40)-H(40)   | 118.9    |
| C(40)-C(41)-C(36)   | 117.9(3) |
| C(40)-C(41)-C(42)   | 117.5(3) |
| C(36)-C(41)-C(42)   | 124.6(2) |
| C(41)-C(42)-C(44)   | 110.6(2) |
| C(41)-C(42)-C(43)   | 113.0(3) |
| C(44)-C(42)-C(43)   | 111.2(3) |
| C(41)-C(42)-H(42)   | 107.2    |
| C(44)-C(42)-H(42)   | 107.2    |
| C(43)-C(42)-H(42)   | 107.2    |
| C(42)-C(43)-H(43A)  | 109.5    |
| C(42)-C(43)-H(43B)  | 109.5    |
| H(43A)-C(43)-H(43B) | 109.5    |
| C(42)-C(43)-H(43C)  | 109.5    |
| H(43A)-C(43)-H(43C) | 109.5    |
| H(43B)-C(43)-H(43C) | 109.5    |

|                     |          |
|---------------------|----------|
| C(42)-C(44)-H(44A)  | 109.5    |
| C(42)-C(44)-H(44B)  | 109.5    |
| H(44A)-C(44)-H(44B) | 109.5    |
| C(42)-C(44)-H(44C)  | 109.5    |
| H(44A)-C(44)-H(44C) | 109.5    |
| H(44B)-C(44)-H(44C) | 109.5    |
| C(47)-C(45)-C(37)   | 112.7(2) |
| C(47)-C(45)-C(46)   | 108.2(2) |
| C(37)-C(45)-C(46)   | 111.7(2) |
| C(47)-C(45)-H(45)   | 108.0    |
| C(37)-C(45)-H(45)   | 108.0    |
| C(46)-C(45)-H(45)   | 108.0    |
| C(45)-C(46)-H(46A)  | 109.5    |
| C(45)-C(46)-H(46B)  | 109.5    |
| H(46A)-C(46)-H(46B) | 109.5    |
| C(45)-C(46)-H(46C)  | 109.5    |
| H(46A)-C(46)-H(46C) | 109.5    |
| H(46B)-C(46)-H(46C) | 109.5    |
| C(45)-C(47)-H(47A)  | 109.5    |
| C(45)-C(47)-H(47B)  | 109.5    |
| H(47A)-C(47)-H(47B) | 109.5    |
| C(45)-C(47)-H(47C)  | 109.5    |
| H(47A)-C(47)-H(47C) | 109.5    |
| H(47B)-C(47)-H(47C) | 109.5    |
| C(53)-C(48)-C(49)   | 121.0(2) |
| C(53)-C(48)-N(5)    | 118.8(2) |
| C(49)-C(48)-N(5)    | 120.2(2) |
| C(50)-C(49)-C(48)   | 118.1(2) |
| C(50)-C(49)-C(57)   | 119.9(2) |
| C(48)-C(49)-C(57)   | 122.0(2) |
| C(51)-C(50)-C(49)   | 121.6(3) |
| C(51)-C(50)-H(50)   | 119.2    |
| C(49)-C(50)-H(50)   | 119.2    |
| C(50)-C(51)-C(52)   | 120.2(3) |
| C(50)-C(51)-H(51)   | 119.9    |
| C(52)-C(51)-H(51)   | 119.9    |

|                     |          |
|---------------------|----------|
| C(51)-C(52)-C(53)   | 120.8(3) |
| C(51)-C(52)-H(52)   | 119.6    |
| C(53)-C(52)-H(52)   | 119.6    |
| C(52)-C(53)-C(48)   | 118.3(2) |
| C(52)-C(53)-C(54)   | 120.0(2) |
| C(48)-C(53)-C(54)   | 121.7(2) |
| C(53)-C(54)-C(56)   | 111.0(2) |
| C(53)-C(54)-C(55)   | 112.1(2) |
| C(56)-C(54)-C(55)   | 109.9(2) |
| C(53)-C(54)-H(54)   | 107.9    |
| C(56)-C(54)-H(54)   | 107.9    |
| C(55)-C(54)-H(54)   | 107.9    |
| C(54)-C(55)-H(55A)  | 109.5    |
| C(54)-C(55)-H(55B)  | 109.5    |
| H(55A)-C(55)-H(55B) | 109.5    |
| C(54)-C(55)-H(55C)  | 109.5    |
| H(55A)-C(55)-H(55C) | 109.5    |
| H(55B)-C(55)-H(55C) | 109.5    |
| C(54)-C(56)-H(56A)  | 109.5    |
| C(54)-C(56)-H(56B)  | 109.5    |
| H(56A)-C(56)-H(56B) | 109.5    |
| C(54)-C(56)-H(56C)  | 109.5    |
| H(56A)-C(56)-H(56C) | 109.5    |
| H(56B)-C(56)-H(56C) | 109.5    |
| C(49)-C(57)-C(58)   | 111.5(3) |
| C(49)-C(57)-C(59)   | 111.6(2) |
| C(58)-C(57)-C(59)   | 111.3(3) |
| C(49)-C(57)-H(57)   | 107.4    |
| C(58)-C(57)-H(57)   | 107.4    |
| C(59)-C(57)-H(57)   | 107.4    |
| C(57)-C(58)-H(58A)  | 109.5    |
| C(57)-C(58)-H(58B)  | 109.5    |
| H(58A)-C(58)-H(58B) | 109.5    |
| C(57)-C(58)-H(58C)  | 109.5    |
| H(58A)-C(58)-H(58C) | 109.5    |
| H(58B)-C(58)-H(58C) | 109.5    |



|                     |       |
|---------------------|-------|
| C(57)-C(59)-H(59A)  | 109.5 |
| C(57)-C(59)-H(59B)  | 109.5 |
| H(59A)-C(59)-H(59B) | 109.5 |
| C(57)-C(59)-H(59C)  | 109.5 |
| H(59A)-C(59)-H(59C) | 109.5 |
| H(59B)-C(59)-H(59C) | 109.5 |

---

Symmetry transformations used to generate equivalent atoms:

Table 4. Anisotropic displacement parameters ( $\text{\AA}^2 \times 10^3$ ) for 3. The anisotropic displacement factor exponent takes the form:  $-2\pi^2 [ h^2 a^{*2} U^{11} + \dots + 2 h k a^* b^* U^{12} ]$

|       | $U^{11}$ | $U^{22}$ | $U^{33}$ | $U^{23}$ | $U^{13}$ | $U^{12}$ |
|-------|----------|----------|----------|----------|----------|----------|
| P(1)  | 23(1)    | 34(1)    | 23(1)    | -4(1)    | 10(1)    | 2(1)     |
| P(2)  | 24(1)    | 34(1)    | 24(1)    | 3(1)     | 12(1)    | 5(1)     |
| O(1)  | 23(1)    | 32(1)    | 26(1)    | -2(1)    | 10(1)    | 4(1)     |
| N(1)  | 27(1)    | 34(1)    | 32(1)    | -2(1)    | 10(1)    | 1(1)     |
| N(2)  | 25(1)    | 28(1)    | 25(1)    | -2(1)    | 6(1)     | 2(1)     |
| N(3)  | 22(1)    | 34(1)    | 21(1)    | -3(1)    | 9(1)     | -3(1)    |
| N(4)  | 31(1)    | 33(1)    | 26(1)    | 4(1)     | 16(1)    | 4(1)     |
| N(5)  | 32(1)    | 32(1)    | 20(1)    | 3(1)     | 11(1)    | 6(1)     |
| C(1)  | 25(1)    | 36(2)    | 21(2)    | 2(1)     | 10(1)    | 2(1)     |
| C(2)  | 29(2)    | 32(2)    | 38(2)    | -4(1)    | 14(1)    | 4(1)     |
| C(3)  | 38(2)    | 38(2)    | 36(2)    | 1(1)     | 14(2)    | -5(1)    |
| C(4)  | 46(2)    | 49(2)    | 29(2)    | 1(2)     | 4(2)     | -6(2)    |
| C(5)  | 43(2)    | 48(2)    | 47(2)    | -1(2)    | 4(2)     | -11(2)   |
| C(6)  | 45(2)    | 53(2)    | 51(2)    | 11(2)    | 14(2)    | -15(2)   |
| C(7)  | 39(2)    | 48(2)    | 35(2)    | 10(2)    | 7(2)     | -3(2)    |
| C(8)  | 27(1)    | 34(2)    | 27(2)    | -1(1)    | 9(1)     | 0(1)     |
| C(9)  | 26(1)    | 30(2)    | 25(2)    | -2(1)    | 7(1)     | 0(1)     |
| C(10) | 33(2)    | 35(2)    | 30(2)    | 3(1)     | 17(1)    | 6(1)     |
| C(11) | 36(2)    | 32(2)    | 27(2)    | 3(1)     | 15(1)    | 6(1)     |
| C(12) | 22(1)    | 27(2)    | 31(2)    | -1(1)    | 4(1)     | 1(1)     |
| C(13) | 25(1)    | 34(2)    | 40(2)    | -9(1)    | 10(1)    | -2(1)    |
| C(14) | 34(2)    | 37(2)    | 53(2)    | -10(2)   | 12(2)    | -1(1)    |
| C(15) | 35(2)    | 36(2)    | 50(2)    | 6(2)     | 8(2)     | -7(1)    |
| C(16) | 34(2)    | 39(2)    | 34(2)    | 6(1)     | 12(1)    | 0(1)     |
| C(17) | 30(2)    | 30(2)    | 27(2)    | 5(1)     | 7(1)     | 1(1)     |
| C(18) | 40(2)    | 36(2)    | 27(2)    | 2(1)     | 15(1)    | 0(1)     |
| C(19) | 52(2)    | 50(2)    | 33(2)    | -2(2)    | 15(2)    | -4(2)    |
| C(20) | 46(2)    | 48(2)    | 37(2)    | 1(1)     | 20(2)    | 4(2)     |
| C(21) | 37(2)    | 36(2)    | 50(2)    | -18(1)   | 22(2)    | -4(1)    |
| C(22) | 49(2)    | 68(2)    | 84(3)    | -23(2)   | 34(2)    | -1(2)    |
| C(23) | 53(2)    | 82(3)    | 46(2)    | -22(2)   | 21(2)    | -15(2)   |

|       |       |        |       |        |       |        |
|-------|-------|--------|-------|--------|-------|--------|
| C(24) | 26(1) | 41(2)  | 28(2) | 0(1)   | 13(1) | -2(1)  |
| C(25) | 39(2) | 41(2)  | 39(2) | 3(1)   | 22(2) | 3(1)   |
| C(26) | 83(2) | 46(2)  | 68(3) | 4(2)   | 53(2) | -1(2)  |
| C(27) | 99(3) | 59(2)  | 74(3) | 12(2)  | 68(3) | -2(2)  |
| C(28) | 63(2) | 64(2)  | 54(2) | 2(2)   | 45(2) | 1(2)   |
| C(29) | 33(2) | 49(2)  | 29(2) | -1(1)  | 17(1) | 2(1)   |
| C(30) | 30(2) | 49(2)  | 29(2) | -6(1)  | 16(1) | 4(1)   |
| C(31) | 37(2) | 62(2)  | 38(2) | -7(2)  | 10(2) | 7(2)   |
| C(32) | 33(2) | 72(2)  | 35(2) | -9(2)  | 11(2) | 11(2)  |
| C(33) | 40(2) | 35(2)  | 39(2) | 1(1)   | 24(2) | 5(1)   |
| C(34) | 54(2) | 45(2)  | 54(2) | 5(2)   | 24(2) | 9(2)   |
| C(35) | 47(2) | 51(2)  | 54(2) | -9(2)  | 23(2) | -2(2)  |
| C(36) | 44(2) | 30(2)  | 23(2) | 4(1)   | 18(1) | 14(1)  |
| C(37) | 45(2) | 31(2)  | 28(2) | 2(1)   | 18(2) | 13(1)  |
| C(38) | 59(2) | 34(2)  | 32(2) | -1(1)  | 18(2) | 5(2)   |
| C(39) | 81(3) | 41(2)  | 38(2) | 3(2)   | 40(2) | 7(2)   |
| C(40) | 59(2) | 43(2)  | 44(2) | 1(2)   | 35(2) | 1(2)   |
| C(41) | 47(2) | 34(2)  | 37(2) | 7(1)   | 29(2) | 11(1)  |
| C(42) | 40(2) | 47(2)  | 45(2) | 3(2)   | 30(2) | 3(2)   |
| C(43) | 42(2) | 83(3)  | 84(3) | -19(2) | 38(2) | 1(2)   |
| C(44) | 79(2) | 54(2)  | 48(2) | 2(2)   | 34(2) | -15(2) |
| C(45) | 36(2) | 42(2)  | 27(2) | -4(1)  | 11(1) | 17(1)  |
| C(46) | 51(2) | 55(2)  | 34(2) | -6(2)  | 4(2)  | 20(2)  |
| C(47) | 42(2) | 52(2)  | 37(2) | -5(2)  | 18(2) | 2(2)   |
| C(48) | 29(2) | 32(2)  | 24(2) | 5(1)   | 12(1) | 3(1)   |
| C(49) | 30(2) | 42(2)  | 31(2) | 8(1)   | 13(1) | 4(1)   |
| C(50) | 24(2) | 58(2)  | 34(2) | 4(2)   | 8(1)  | -1(1)  |
| C(51) | 36(2) | 47(2)  | 27(2) | 2(1)   | 8(1)  | -3(1)  |
| C(52) | 37(2) | 36(2)  | 27(2) | 1(1)   | 16(1) | 1(1)   |
| C(53) | 32(2) | 29(2)  | 25(2) | 4(1)   | 14(1) | 4(1)   |
| C(54) | 26(1) | 43(2)  | 29(2) | 3(1)   | 13(1) | 5(1)   |
| C(55) | 35(2) | 55(2)  | 34(2) | 7(2)   | 18(1) | 10(1)  |
| C(56) | 35(2) | 50(2)  | 48(2) | 5(2)   | 21(2) | -1(1)  |
| C(57) | 27(2) | 64(2)  | 36(2) | 7(2)   | 16(1) | 9(2)   |
| C(58) | 54(2) | 89(3)  | 59(2) | 4(2)   | 37(2) | -11(2) |
| C(59) | 47(2) | 103(3) | 61(3) | 20(2)  | 33(2) | 31(2)  |



Table 5. Hydrogen coordinates ( $\times 10^4$ ) and isotropic displacement parameters ( $\text{\AA}^2 \times 10^{-3}$ ) for 3.

|        | x    | y     | z     | U(eq) |
|--------|------|-------|-------|-------|
| H(3)   | 2929 | 10523 | 2486  | 45    |
| H(4)   | 3635 | 11159 | 3018  | 53    |
| H(5)   | 3896 | 12008 | 2496  | 59    |
| H(6)   | 3442 | 12223 | 1432  | 61    |
| H(7)   | 2717 | 11630 | 906   | 51    |
| H(8A)  | 722  | 10634 | -435  | 36    |
| H(8B)  | 486  | 10860 | 67    | 36    |
| H(9A)  | 325  | 9699  | 6     | 33    |
| H(9B)  | 819  | 9509  | -99   | 33    |
| H(10A) | 2505 | 7851  | 658   | 37    |
| H(10B) | 2129 | 8333  | 831   | 37    |
| H(11A) | 2623 | 7984  | 1821  | 36    |
| H(11B) | 3100 | 7961  | 1643  | 36    |
| H(14)  | 1644 | 12979 | 936   | 51    |
| H(15)  | 1963 | 13087 | 158   | 52    |
| H(16)  | 1964 | 12135 | -474  | 43    |
| H(18)  | 1519 | 10436 | -350  | 40    |
| H(19A) | 995  | 11071 | -1227 | 68    |
| H(19B) | 1343 | 10586 | -1441 | 68    |
| H(19C) | 1454 | 11398 | -1334 | 68    |
| H(20A) | 2312 | 11083 | -578  | 63    |
| H(20B) | 2184 | 10274 | -665  | 63    |
| H(20C) | 2382 | 10612 | 26    | 63    |
| H(21)  | 1133 | 11441 | 1311  | 47    |
| H(22A) | 879  | 12876 | 1161  | 97    |
| H(22B) | 627  | 12293 | 1433  | 97    |
| H(22C) | 554  | 12284 | 703   | 97    |
| H(23A) | 1900 | 11788 | 2033  | 90    |
| H(23B) | 1482 | 12062 | 2260  | 90    |
| H(23C) | 1736 | 12584 | 1933  | 90    |

|        |      |       |       |    |
|--------|------|-------|-------|----|
| H(26)  | 609  | 7711  | 1518  | 70 |
| H(27)  | 363  | 8227  | 2260  | 80 |
| H(28)  | 329  | 9418  | 2318  | 64 |
| H(30)  | 603  | 10636 | 1316  | 41 |
| H(31A) | 818  | 10479 | 2638  | 70 |
| H(31B) | 811  | 11212 | 2306  | 70 |
| H(31C) | 1209 | 10640 | 2327  | 70 |
| H(32A) | -85  | 10438 | 1907  | 70 |
| H(32B) | -227 | 10405 | 1159  | 70 |
| H(32C) | -41  | 11118 | 1530  | 70 |
| H(33)  | 1143 | 8578  | 555   | 43 |
| H(34A) | 1563 | 7786  | 1392  | 75 |
| H(34B) | 1428 | 7434  | 713   | 75 |
| H(34C) | 1111 | 7264  | 1127  | 75 |
| H(35A) | 317  | 7666  | 267   | 74 |
| H(35B) | 635  | 7731  | -162  | 74 |
| H(35C) | 320  | 8377  | -93   | 74 |
| H(38)  | 2002 | 8494  | -1430 | 49 |
| H(39)  | 2724 | 8755  | -1571 | 58 |
| H(40)  | 3399 | 9134  | -723  | 53 |
| H(42)  | 3543 | 9183  | 886   | 48 |
| H(43A) | 3980 | 8399  | 498   | 99 |
| H(43B) | 4315 | 9042  | 847   | 99 |
| H(43C) | 4084 | 9010  | 91    | 99 |
| H(44A) | 3651 | 10200 | 39    | 86 |
| H(44B) | 3946 | 10215 | 788   | 86 |
| H(44C) | 3365 | 10309 | 502   | 86 |
| H(45)  | 1765 | 8753  | -33   | 42 |
| H(46A) | 1440 | 9470  | -960  | 75 |
| H(46B) | 1042 | 8947  | -892  | 75 |
| H(46C) | 1296 | 8781  | -1382 | 75 |
| H(47A) | 1602 | 7638  | -912  | 64 |
| H(47B) | 1289 | 7768  | -484  | 64 |
| H(47C) | 1854 | 7560  | -161  | 64 |
| H(50)  | 4259 | 9373  | 3496  | 47 |
| H(51)  | 3831 | 9509  | 4146  | 45 |

|        |      |       |      |     |
|--------|------|-------|------|-----|
| H(52)  | 2989 | 9346  | 3755 | 39  |
| H(54)  | 2233 | 8992  | 2128 | 38  |
| H(55A) | 2211 | 9704  | 3216 | 60  |
| H(55B) | 1739 | 9554  | 2592 | 60  |
| H(55C) | 2155 | 10068 | 2564 | 60  |
| H(56A) | 2381 | 7968  | 2733 | 64  |
| H(56B) | 1870 | 8297  | 2681 | 64  |
| H(56C) | 2343 | 8386  | 3317 | 64  |
| H(57)  | 3741 | 8936  | 1845 | 49  |
| H(58A) | 4481 | 9835  | 2654 | 94  |
| H(58B) | 4003 | 10093 | 2080 | 94  |
| H(58C) | 4407 | 9644  | 1942 | 94  |
| H(59A) | 4506 | 8382  | 2225 | 100 |
| H(59B) | 4147 | 8019  | 2510 | 100 |
| H(59C) | 4564 | 8537  | 2938 | 100 |

---

## Crystallography tables for compound 4

Table 1. Crystal data and structure refinement for 4.

|                                   |                                                                 |                 |
|-----------------------------------|-----------------------------------------------------------------|-----------------|
| Identification code               | NG128_0m                                                        |                 |
| Empirical formula                 | C <sub>59</sub> H <sub>81</sub> N <sub>5</sub> P <sub>2</sub> S |                 |
| Formula weight                    | 954.28                                                          |                 |
| Temperature                       | 150(2) K                                                        |                 |
| Wavelength                        | 0.71073 Å                                                       |                 |
| Crystal system                    | Triclinic                                                       |                 |
| Space group                       | P-1                                                             |                 |
| Unit cell dimensions              | a = 12.751(6) Å                                                 | α = 86.729(7)°. |
|                                   | b = 13.140(6) Å                                                 | β = 85.693(8)°. |
|                                   | c = 17.906(9) Å                                                 | γ = 65.164(7)°. |
| Volume                            | 2714(2) Å <sup>3</sup>                                          |                 |
| Z                                 | 2                                                               |                 |
| Density (calculated)              | 1.168 Mg/m <sup>3</sup>                                         |                 |
| Absorption coefficient            | 0.161 mm <sup>-1</sup>                                          |                 |
| F(000)                            | 1032                                                            |                 |
| Crystal size                      | .118 x .113 x .087 mm <sup>3</sup>                              |                 |
| Theta range for data collection   | 1.874 to 24.997°.                                               |                 |
| Index ranges                      | -13 ≤ h ≤ 15, -14 ≤ k ≤ 15, -21 ≤ l ≤ 21                        |                 |
| Reflections collected             | 18107                                                           |                 |
| Independent reflections           | 9374 [R(int) = 0.2306]                                          |                 |
| Completeness to theta = 24.997°   | 98.0 %                                                          |                 |
| Absorption correction             | Semi-empirical from equivalents                                 |                 |
| Max. and min. transmission        | 0.7456 and 0.5617                                               |                 |
| Refinement method                 | Full-matrix least-squares on F <sup>2</sup>                     |                 |
| Data / restraints / parameters    | 9374 / 0 / 620                                                  |                 |
| Goodness-of-fit on F <sup>2</sup> | 0.947                                                           |                 |
| Final R indices [I > 2σ(I)]       | R1 = 0.1097, wR2 = 0.1989                                       |                 |
| R indices (all data)              | R1 = 0.3317, wR2 = 0.3029                                       |                 |
| Extinction coefficient            | n/a                                                             |                 |
| Largest diff. peak and hole       | 0.389 and -0.454 e.Å <sup>-3</sup>                              |                 |



Table 2. Atomic coordinates ( $\times 10^4$ ) and equivalent isotropic displacement parameters ( $\text{\AA}^2 \times 10^3$ ) for 4.  $U(\text{eq})$  is defined as one third of the trace of the orthogonalized  $U^{ij}$  tensor.

|       | x        | y        | z       | $U(\text{eq})$ |
|-------|----------|----------|---------|----------------|
| S(1)  | 7200(2)  | 847(2)   | 2485(2) | 29(1)          |
| P(1)  | 4827(2)  | 2546(2)  | 3223(2) | 27(1)          |
| P(2)  | 7420(2)  | 39(2)    | 1394(2) | 27(1)          |
| N(1)  | 5854(6)  | 2660(6)  | 3741(5) | 25(2)          |
| N(2)  | 4727(6)  | 1554(6)  | 3853(4) | 21(2)          |
| N(3)  | 8028(7)  | 708(6)   | 804(5)  | 27(2)          |
| N(4)  | 8745(7)  | -1011(7) | 1514(5) | 29(2)          |
| N(5)  | 5357(7)  | 1958(7)  | 1732(5) | 31(2)          |
| C(1)  | 5975(9)  | 2055(8)  | 4467(5) | 27(3)          |
| C(2)  | 5677(8)  | 1072(8)  | 4333(6) | 30(3)          |
| C(3)  | 9249(8)  | 388(8)   | 948(6)  | 28(3)          |
| C(4)  | 9719(9)  | -876(8)  | 1131(6) | 32(3)          |
| C(9)  | 5744(8)  | 1744(8)  | 2403(6) | 29(3)          |
| C(11) | 4161(10) | 2586(9)  | 1637(6) | 36(3)          |
| C(12) | 3823(10) | 3509(10) | 1143(6) | 43(3)          |
| C(13) | 2643(12) | 4176(11) | 1077(8) | 61(4)          |
| C(14) | 1830(11) | 3877(11) | 1455(7) | 52(4)          |
| C(15) | 2175(10) | 2934(10) | 1910(7) | 46(3)          |
| C(16) | 3340(9)  | 2292(8)  | 2003(6) | 33(3)          |
| C(23) | 6176(8)  | 3583(8)  | 3676(6) | 27(3)          |
| C(24) | 5322(9)  | 4725(8)  | 3644(6) | 30(3)          |
| C(25) | 5716(10) | 5560(8)  | 3544(6) | 41(3)          |
| C(26) | 6859(10) | 5349(9)  | 3520(7) | 50(4)          |
| C(27) | 7682(9)  | 4231(9)  | 3573(7) | 45(3)          |
| C(28) | 7361(9)  | 3348(8)  | 3649(6) | 30(3)          |
| C(29) | 4042(8)  | 5028(8)  | 3712(6) | 31(3)          |
| C(30) | 3515(9)  | 5446(8)  | 2942(6) | 43(3)          |
| C(31) | 3438(9)  | 5918(8)  | 4292(6) | 46(3)          |
| C(32) | 8317(9)  | 2166(9)  | 3716(6) | 36(3)          |
| C(33) | 9272(9)  | 1928(9)  | 3077(6) | 45(3)          |
| C(34) | 8846(9)  | 1978(8)  | 4469(6) | 41(3)          |

|       |          |           |          |        |
|-------|----------|-----------|----------|--------|
| C(35) | 3847(8)  | 1162(8)   | 3869(6)  | 28(3)  |
| C(36) | 4129(8)  | 60(8)     | 3614(6)  | 28(3)  |
| C(37) | 3312(8)  | -354(9)   | 3703(6)  | 37(3)  |
| C(38) | 2234(10) | 261(10)   | 4031(6)  | 42(3)  |
| C(39) | 1958(9)  | 1333(9)   | 4270(6)  | 36(3)  |
| C(40) | 2733(8)  | 1808(8)   | 4193(6)  | 29(3)  |
| C(41) | 5286(8)  | -612(8)   | 3231(6)  | 30(3)  |
| C(42) | 5198(9)  | -1047(9)  | 2497(6)  | 43(3)  |
| C(43) | 6027(9)  | -1585(8)  | 3726(6)  | 42(3)  |
| C(44) | 2398(9)  | 2998(8)   | 4448(6)  | 34(3)  |
| C(45) | 1779(9)  | 3835(8)   | 3818(6)  | 44(3)  |
| C(46) | 1594(9)  | 3311(9)   | 5143(6)  | 44(3)  |
| C(47) | 7422(9)  | 1607(9)   | 272(6)   | 35(3)  |
| C(48) | 7181(9)  | 2723(9)   | 452(6)   | 37(3)  |
| C(49) | 6625(10) | 3539(10)  | -90(7)   | 56(4)  |
| C(50) | 6290(12) | 3295(11)  | -733(8)  | 71(5)  |
| C(51) | 6546(10) | 2203(11)  | -885(7)  | 54(4)  |
| C(52) | 7134(8)  | 1338(9)   | -396(6)  | 33(3)  |
| C(53) | 7519(9)  | 3028(9)   | 1153(6)  | 36(3)  |
| C(54) | 6566(9)  | 4028(8)   | 1538(6)  | 44(3)  |
| C(55) | 8594(10) | 3275(9)   | 1012(6)  | 50(4)  |
| C(56) | 7384(10) | 125(9)    | -571(6)  | 42(3)  |
| C(57) | 7868(9)  | -171(10)  | -1381(6) | 48(3)  |
| C(58) | 6285(10) | -62(11)   | -426(7)  | 61(4)  |
| C(59) | 8934(8)  | -2022(8)  | 1954(6)  | 25(3)  |
| C(60) | 9476(8)  | -2219(8)  | 2614(6)  | 28(3)  |
| C(61) | 9688(9)  | -3229(9)  | 3010(6)  | 41(3)  |
| C(62) | 9330(10) | -3983(9)  | 2759(7)  | 44(3)  |
| C(63) | 8776(9)  | -3779(9)  | 2105(7)  | 46(3)  |
| C(64) | 8591(9)  | -2804(8)  | 1664(6)  | 29(3)  |
| C(65) | 9819(8)  | -1369(8)  | 2935(6)  | 32(3)  |
| C(66) | 9293(10) | -1058(8)  | 3744(6)  | 45(3)  |
| C(67) | 11135(9) | -1758(9)  | 2930(6)  | 48(3)  |
| C(68) | 8090(11) | -2686(9)  | 924(7)   | 49(4)  |
| C(69) | 9004(13) | -3234(15) | 328(8)   | 109(7) |
| C(70) | 7107(10) | -3052(10) | 886(7)   | 66(4)  |



Table 3. Bond lengths [ $\text{\AA}$ ] and angles [ $^\circ$ ] for 4.

---

|             |           |
|-------------|-----------|
| S(1)-C(9)   | 1.744(9)  |
| S(1)-P(2)   | 2.220(4)  |
| P(1)-N(2)   | 1.713(8)  |
| P(1)-N(1)   | 1.721(8)  |
| P(1)-C(9)   | 1.876(10) |
| P(2)-N(3)   | 1.683(9)  |
| P(2)-N(4)   | 1.693(8)  |
| N(1)-C(23)  | 1.431(12) |
| N(1)-C(1)   | 1.468(12) |
| N(2)-C(35)  | 1.416(12) |
| N(2)-C(2)   | 1.435(11) |
| N(3)-C(47)  | 1.455(12) |
| N(3)-C(3)   | 1.471(11) |
| N(4)-C(59)  | 1.443(12) |
| N(4)-C(4)   | 1.445(12) |
| N(5)-C(9)   | 1.303(11) |
| N(5)-C(11)  | 1.415(12) |
| C(1)-C(2)   | 1.527(13) |
| C(1)-H(1A)  | 0.9900    |
| C(1)-H(1B)  | 0.9900    |
| C(2)-H(2A)  | 0.9900    |
| C(2)-H(2B)  | 0.9900    |
| C(3)-C(4)   | 1.534(13) |
| C(3)-H(3A)  | 0.9900    |
| C(3)-H(3B)  | 0.9900    |
| C(4)-H(4A)  | 0.9900    |
| C(4)-H(4B)  | 0.9900    |
| C(11)-C(16) | 1.372(15) |
| C(11)-C(12) | 1.392(15) |
| C(12)-C(13) | 1.397(15) |
| C(12)-H(12) | 0.9500    |
| C(13)-C(14) | 1.376(17) |
| C(13)-H(13) | 0.9500    |
| C(14)-C(15) | 1.369(16) |

|              |           |
|--------------|-----------|
| C(14)-H(14)  | 0.9500    |
| C(15)-C(16)  | 1.384(13) |
| C(15)-H(15)  | 0.9500    |
| C(16)-H(16)  | 0.9500    |
| C(23)-C(28)  | 1.407(13) |
| C(23)-C(24)  | 1.437(12) |
| C(24)-C(25)  | 1.383(14) |
| C(24)-C(29)  | 1.506(13) |
| C(25)-C(26)  | 1.363(14) |
| C(25)-H(25A) | 0.9500    |
| C(26)-C(27)  | 1.405(13) |
| C(26)-H(26A) | 0.9500    |
| C(27)-C(28)  | 1.380(14) |
| C(27)-H(27A) | 0.9500    |
| C(28)-C(32)  | 1.524(12) |
| C(29)-C(31)  | 1.517(12) |
| C(29)-C(30)  | 1.547(13) |
| C(29)-H(29A) | 1.0000    |
| C(30)-H(30A) | 0.9800    |
| C(30)-H(30B) | 0.9800    |
| C(30)-H(30C) | 0.9800    |
| C(31)-H(31A) | 0.9800    |
| C(31)-H(31B) | 0.9800    |
| C(31)-H(31C) | 0.9800    |
| C(32)-C(34)  | 1.514(13) |
| C(32)-C(33)  | 1.551(14) |
| C(32)-H(32)  | 1.0000    |
| C(33)-H(33A) | 0.9800    |
| C(33)-H(33B) | 0.9800    |
| C(33)-H(33C) | 0.9800    |
| C(34)-H(34A) | 0.9800    |
| C(34)-H(34B) | 0.9800    |
| C(34)-H(34C) | 0.9800    |
| C(35)-C(40)  | 1.412(12) |
| C(35)-C(36)  | 1.430(13) |
| C(36)-C(37)  | 1.361(14) |

|              |           |
|--------------|-----------|
| C(36)-C(41)  | 1.499(13) |
| C(37)-C(38)  | 1.374(13) |
| C(37)-H(37A) | 0.9500    |
| C(38)-C(39)  | 1.385(13) |
| C(38)-H(38A) | 0.9500    |
| C(39)-C(40)  | 1.368(13) |
| C(39)-H(39A) | 0.9500    |
| C(40)-C(44)  | 1.526(13) |
| C(41)-C(42)  | 1.493(12) |
| C(41)-C(43)  | 1.515(13) |
| C(41)-H(41A) | 1.0000    |
| C(42)-H(42A) | 0.9800    |
| C(42)-H(42B) | 0.9800    |
| C(42)-H(42C) | 0.9800    |
| C(43)-H(43A) | 0.9800    |
| C(43)-H(43B) | 0.9800    |
| C(43)-H(43C) | 0.9800    |
| C(44)-C(46)  | 1.510(14) |
| C(44)-C(45)  | 1.539(13) |
| C(44)-H(44A) | 1.0000    |
| C(45)-H(45A) | 0.9800    |
| C(45)-H(45B) | 0.9800    |
| C(45)-H(45C) | 0.9800    |
| C(46)-H(46A) | 0.9800    |
| C(46)-H(46B) | 0.9800    |
| C(46)-H(46C) | 0.9800    |
| C(47)-C(52)  | 1.385(13) |
| C(47)-C(48)  | 1.418(14) |
| C(48)-C(49)  | 1.393(14) |
| C(48)-C(53)  | 1.485(13) |
| C(49)-C(50)  | 1.357(15) |
| C(49)-H(49A) | 0.9500    |
| C(50)-C(51)  | 1.370(16) |
| C(50)-H(50A) | 0.9500    |
| C(51)-C(52)  | 1.375(14) |
| C(51)-H(51A) | 0.9500    |

|              |           |
|--------------|-----------|
| C(52)-C(56)  | 1.534(14) |
| C(53)-C(54)  | 1.521(13) |
| C(53)-C(55)  | 1.535(14) |
| C(53)-H(53A) | 1.0000    |
| C(54)-H(54A) | 0.9800    |
| C(54)-H(54B) | 0.9800    |
| C(54)-H(54C) | 0.9800    |
| C(55)-H(55A) | 0.9800    |
| C(55)-H(55B) | 0.9800    |
| C(55)-H(55C) | 0.9800    |
| C(56)-C(58)  | 1.522(15) |
| C(56)-C(57)  | 1.538(14) |
| C(56)-H(56A) | 1.0000    |
| C(57)-H(57A) | 0.9800    |
| C(57)-H(57B) | 0.9800    |
| C(57)-H(57C) | 0.9800    |
| C(58)-H(58A) | 0.9800    |
| C(58)-H(58B) | 0.9800    |
| C(58)-H(58C) | 0.9800    |
| C(59)-C(60)  | 1.371(12) |
| C(59)-C(64)  | 1.410(13) |
| C(60)-C(61)  | 1.400(14) |
| C(60)-C(65)  | 1.512(13) |
| C(61)-C(62)  | 1.362(14) |
| C(61)-H(61A) | 0.9500    |
| C(62)-C(63)  | 1.368(13) |
| C(62)-H(62A) | 0.9500    |
| C(63)-C(64)  | 1.407(14) |
| C(63)-H(63A) | 0.9500    |
| C(64)-C(68)  | 1.487(13) |
| C(65)-C(67)  | 1.535(13) |
| C(65)-C(66)  | 1.551(13) |
| C(65)-H(65A) | 1.0000    |
| C(66)-H(66A) | 0.9800    |
| C(66)-H(66B) | 0.9800    |
| C(66)-H(66C) | 0.9800    |

|                 |           |
|-----------------|-----------|
| C(67)-H(67A)    | 0.9800    |
| C(67)-H(67B)    | 0.9800    |
| C(67)-H(67C)    | 0.9800    |
| C(68)-C(69)     | 1.488(16) |
| C(68)-C(70)     | 1.526(15) |
| C(68)-H(68A)    | 1.0000    |
| C(69)-H(69A)    | 0.9800    |
| C(69)-H(69B)    | 0.9800    |
| C(69)-H(69C)    | 0.9800    |
| C(70)-H(70A)    | 0.9800    |
| C(70)-H(70B)    | 0.9800    |
| C(70)-H(70C)    | 0.9800    |
|                 |           |
| C(9)-S(1)-P(2)  | 95.5(4)   |
| N(2)-P(1)-N(1)  | 90.0(4)   |
| N(2)-P(1)-C(9)  | 105.5(4)  |
| N(1)-P(1)-C(9)  | 101.2(4)  |
| N(3)-P(2)-N(4)  | 89.7(4)   |
| N(3)-P(2)-S(1)  | 104.5(3)  |
| N(4)-P(2)-S(1)  | 97.6(3)   |
| C(23)-N(1)-C(1) | 117.8(8)  |
| C(23)-N(1)-P(1) | 124.2(7)  |
| C(1)-N(1)-P(1)  | 112.5(6)  |
| C(35)-N(2)-C(2) | 121.6(8)  |
| C(35)-N(2)-P(1) | 124.1(6)  |
| C(2)-N(2)-P(1)  | 114.0(7)  |
| C(47)-N(3)-C(3) | 121.6(9)  |
| C(47)-N(3)-P(2) | 125.8(7)  |
| C(3)-N(3)-P(2)  | 112.1(6)  |
| C(59)-N(4)-C(4) | 119.7(8)  |
| C(59)-N(4)-P(2) | 123.6(7)  |
| C(4)-N(4)-P(2)  | 116.7(7)  |
| C(9)-N(5)-C(11) | 120.0(8)  |
| N(1)-C(1)-C(2)  | 104.9(8)  |
| N(1)-C(1)-H(1A) | 110.8     |
| C(2)-C(1)-H(1A) | 110.8     |



|                   |           |
|-------------------|-----------|
| N(1)-C(1)-H(1B)   | 110.8     |
| C(2)-C(1)-H(1B)   | 110.8     |
| H(1A)-C(1)-H(1B)  | 108.8     |
| N(2)-C(2)-C(1)    | 103.3(8)  |
| N(2)-C(2)-H(2A)   | 111.1     |
| C(1)-C(2)-H(2A)   | 111.1     |
| N(2)-C(2)-H(2B)   | 111.1     |
| C(1)-C(2)-H(2B)   | 111.1     |
| H(2A)-C(2)-H(2B)  | 109.1     |
| N(3)-C(3)-C(4)    | 103.9(8)  |
| N(3)-C(3)-H(3A)   | 111.0     |
| C(4)-C(3)-H(3A)   | 111.0     |
| N(3)-C(3)-H(3B)   | 111.0     |
| C(4)-C(3)-H(3B)   | 111.0     |
| H(3A)-C(3)-H(3B)  | 109.0     |
| N(4)-C(4)-C(3)    | 103.8(8)  |
| N(4)-C(4)-H(4A)   | 111.0     |
| C(3)-C(4)-H(4A)   | 111.0     |
| N(4)-C(4)-H(4B)   | 111.0     |
| C(3)-C(4)-H(4B)   | 111.0     |
| H(4A)-C(4)-H(4B)  | 109.0     |
| N(5)-C(9)-S(1)    | 117.6(8)  |
| N(5)-C(9)-P(1)    | 120.6(7)  |
| S(1)-C(9)-P(1)    | 121.2(6)  |
| C(16)-C(11)-C(12) | 119.8(11) |
| C(16)-C(11)-N(5)  | 121.9(11) |
| C(12)-C(11)-N(5)  | 118.4(11) |
| C(11)-C(12)-C(13) | 119.0(12) |
| C(11)-C(12)-H(12) | 120.5     |
| C(13)-C(12)-H(12) | 120.5     |
| C(14)-C(13)-C(12) | 120.3(13) |
| C(14)-C(13)-H(13) | 119.8     |
| C(12)-C(13)-H(13) | 119.8     |
| C(15)-C(14)-C(13) | 120.0(12) |
| C(15)-C(14)-H(14) | 120.0     |
| C(13)-C(14)-H(14) | 120.0     |

|                     |           |
|---------------------|-----------|
| C(14)-C(15)-C(16)   | 120.1(13) |
| C(14)-C(15)-H(15)   | 119.9     |
| C(16)-C(15)-H(15)   | 119.9     |
| C(11)-C(16)-C(15)   | 120.6(11) |
| C(11)-C(16)-H(16)   | 119.7     |
| C(15)-C(16)-H(16)   | 119.7     |
| C(28)-C(23)-N(1)    | 118.2(9)  |
| C(28)-C(23)-C(24)   | 120.2(9)  |
| N(1)-C(23)-C(24)    | 121.6(9)  |
| C(25)-C(24)-C(23)   | 117.5(9)  |
| C(25)-C(24)-C(29)   | 120.0(9)  |
| C(23)-C(24)-C(29)   | 122.5(9)  |
| C(26)-C(25)-C(24)   | 123.1(10) |
| C(26)-C(25)-H(25A)  | 118.5     |
| C(24)-C(25)-H(25A)  | 118.5     |
| C(25)-C(26)-C(27)   | 118.7(10) |
| C(25)-C(26)-H(26A)  | 120.7     |
| C(27)-C(26)-H(26A)  | 120.7     |
| C(28)-C(27)-C(26)   | 121.8(10) |
| C(28)-C(27)-H(27A)  | 119.1     |
| C(26)-C(27)-H(27A)  | 119.1     |
| C(27)-C(28)-C(23)   | 118.6(9)  |
| C(27)-C(28)-C(32)   | 117.9(9)  |
| C(23)-C(28)-C(32)   | 123.5(9)  |
| C(24)-C(29)-C(31)   | 110.9(9)  |
| C(24)-C(29)-C(30)   | 109.9(9)  |
| C(31)-C(29)-C(30)   | 110.2(8)  |
| C(24)-C(29)-H(29A)  | 108.6     |
| C(31)-C(29)-H(29A)  | 108.6     |
| C(30)-C(29)-H(29A)  | 108.6     |
| C(29)-C(30)-H(30A)  | 109.5     |
| C(29)-C(30)-H(30B)  | 109.5     |
| H(30A)-C(30)-H(30B) | 109.5     |
| C(29)-C(30)-H(30C)  | 109.5     |
| H(30A)-C(30)-H(30C) | 109.5     |
| H(30B)-C(30)-H(30C) | 109.5     |

|                     |           |
|---------------------|-----------|
| C(29)-C(31)-H(31A)  | 109.5     |
| C(29)-C(31)-H(31B)  | 109.5     |
| H(31A)-C(31)-H(31B) | 109.5     |
| C(29)-C(31)-H(31C)  | 109.5     |
| H(31A)-C(31)-H(31C) | 109.5     |
| H(31B)-C(31)-H(31C) | 109.5     |
| C(34)-C(32)-C(28)   | 110.5(8)  |
| C(34)-C(32)-C(33)   | 109.9(8)  |
| C(28)-C(32)-C(33)   | 111.9(9)  |
| C(34)-C(32)-H(32)   | 108.1     |
| C(28)-C(32)-H(32)   | 108.1     |
| C(33)-C(32)-H(32)   | 108.1     |
| C(32)-C(33)-H(33A)  | 109.5     |
| C(32)-C(33)-H(33B)  | 109.5     |
| H(33A)-C(33)-H(33B) | 109.5     |
| C(32)-C(33)-H(33C)  | 109.5     |
| H(33A)-C(33)-H(33C) | 109.5     |
| H(33B)-C(33)-H(33C) | 109.5     |
| C(32)-C(34)-H(34A)  | 109.5     |
| C(32)-C(34)-H(34B)  | 109.5     |
| H(34A)-C(34)-H(34B) | 109.5     |
| C(32)-C(34)-H(34C)  | 109.5     |
| H(34A)-C(34)-H(34C) | 109.5     |
| H(34B)-C(34)-H(34C) | 109.5     |
| C(40)-C(35)-N(2)    | 120.4(9)  |
| C(40)-C(35)-C(36)   | 120.2(10) |
| N(2)-C(35)-C(36)    | 119.1(8)  |
| C(37)-C(36)-C(35)   | 118.7(9)  |
| C(37)-C(36)-C(41)   | 120.4(9)  |
| C(35)-C(36)-C(41)   | 120.9(10) |
| C(36)-C(37)-C(38)   | 121.3(11) |
| C(36)-C(37)-H(37A)  | 119.3     |
| C(38)-C(37)-H(37A)  | 119.3     |
| C(37)-C(38)-C(39)   | 119.9(11) |
| C(37)-C(38)-H(38A)  | 120.1     |
| C(39)-C(38)-H(38A)  | 120.1     |

|                     |           |
|---------------------|-----------|
| C(40)-C(39)-C(38)   | 122.0(10) |
| C(40)-C(39)-H(39A)  | 119.0     |
| C(38)-C(39)-H(39A)  | 119.0     |
| C(39)-C(40)-C(35)   | 117.9(9)  |
| C(39)-C(40)-C(44)   | 120.8(9)  |
| C(35)-C(40)-C(44)   | 121.3(10) |
| C(42)-C(41)-C(36)   | 113.1(8)  |
| C(42)-C(41)-C(43)   | 109.1(8)  |
| C(36)-C(41)-C(43)   | 111.3(9)  |
| C(42)-C(41)-H(41A)  | 107.7     |
| C(36)-C(41)-H(41A)  | 107.7     |
| C(43)-C(41)-H(41A)  | 107.7     |
| C(41)-C(42)-H(42A)  | 109.5     |
| C(41)-C(42)-H(42B)  | 109.5     |
| H(42A)-C(42)-H(42B) | 109.5     |
| C(41)-C(42)-H(42C)  | 109.5     |
| H(42A)-C(42)-H(42C) | 109.5     |
| H(42B)-C(42)-H(42C) | 109.5     |
| C(41)-C(43)-H(43A)  | 109.5     |
| C(41)-C(43)-H(43B)  | 109.5     |
| H(43A)-C(43)-H(43B) | 109.5     |
| C(41)-C(43)-H(43C)  | 109.5     |
| H(43A)-C(43)-H(43C) | 109.5     |
| H(43B)-C(43)-H(43C) | 109.5     |
| C(46)-C(44)-C(40)   | 114.4(10) |
| C(46)-C(44)-C(45)   | 107.2(9)  |
| C(40)-C(44)-C(45)   | 108.9(8)  |
| C(46)-C(44)-H(44A)  | 108.7     |
| C(40)-C(44)-H(44A)  | 108.7     |
| C(45)-C(44)-H(44A)  | 108.7     |
| C(44)-C(45)-H(45A)  | 109.5     |
| C(44)-C(45)-H(45B)  | 109.5     |
| H(45A)-C(45)-H(45B) | 109.5     |
| C(44)-C(45)-H(45C)  | 109.5     |
| H(45A)-C(45)-H(45C) | 109.5     |
| H(45B)-C(45)-H(45C) | 109.5     |

|                     |           |
|---------------------|-----------|
| C(44)-C(46)-H(46A)  | 109.5     |
| C(44)-C(46)-H(46B)  | 109.5     |
| H(46A)-C(46)-H(46B) | 109.5     |
| C(44)-C(46)-H(46C)  | 109.5     |
| H(46A)-C(46)-H(46C) | 109.5     |
| H(46B)-C(46)-H(46C) | 109.5     |
| C(52)-C(47)-C(48)   | 122.7(10) |
| C(52)-C(47)-N(3)    | 118.9(10) |
| C(48)-C(47)-N(3)    | 118.4(9)  |
| C(49)-C(48)-C(47)   | 115.4(11) |
| C(49)-C(48)-C(53)   | 121.0(10) |
| C(47)-C(48)-C(53)   | 123.7(9)  |
| C(50)-C(49)-C(48)   | 122.7(12) |
| C(50)-C(49)-H(49A)  | 118.6     |
| C(48)-C(49)-H(49A)  | 118.6     |
| C(49)-C(50)-C(51)   | 119.8(12) |
| C(49)-C(50)-H(50A)  | 120.1     |
| C(51)-C(50)-H(50A)  | 120.1     |
| C(50)-C(51)-C(52)   | 121.5(12) |
| C(50)-C(51)-H(51A)  | 119.3     |
| C(52)-C(51)-H(51A)  | 119.3     |
| C(51)-C(52)-C(47)   | 117.8(11) |
| C(51)-C(52)-C(56)   | 120.4(10) |
| C(47)-C(52)-C(56)   | 121.6(10) |
| C(48)-C(53)-C(54)   | 114.0(8)  |
| C(48)-C(53)-C(55)   | 111.4(9)  |
| C(54)-C(53)-C(55)   | 108.4(9)  |
| C(48)-C(53)-H(53A)  | 107.6     |
| C(54)-C(53)-H(53A)  | 107.6     |
| C(55)-C(53)-H(53A)  | 107.6     |
| C(53)-C(54)-H(54A)  | 109.5     |
| C(53)-C(54)-H(54B)  | 109.5     |
| H(54A)-C(54)-H(54B) | 109.5     |
| C(53)-C(54)-H(54C)  | 109.5     |
| H(54A)-C(54)-H(54C) | 109.5     |
| H(54B)-C(54)-H(54C) | 109.5     |

|                     |           |
|---------------------|-----------|
| C(53)-C(55)-H(55A)  | 109.5     |
| C(53)-C(55)-H(55B)  | 109.5     |
| H(55A)-C(55)-H(55B) | 109.5     |
| C(53)-C(55)-H(55C)  | 109.5     |
| H(55A)-C(55)-H(55C) | 109.5     |
| H(55B)-C(55)-H(55C) | 109.5     |
| C(58)-C(56)-C(52)   | 109.8(9)  |
| C(58)-C(56)-C(57)   | 110.0(9)  |
| C(52)-C(56)-C(57)   | 112.2(10) |
| C(58)-C(56)-H(56A)  | 108.2     |
| C(52)-C(56)-H(56A)  | 108.2     |
| C(57)-C(56)-H(56A)  | 108.2     |
| C(56)-C(57)-H(57A)  | 109.5     |
| C(56)-C(57)-H(57B)  | 109.5     |
| H(57A)-C(57)-H(57B) | 109.5     |
| C(56)-C(57)-H(57C)  | 109.5     |
| H(57A)-C(57)-H(57C) | 109.5     |
| H(57B)-C(57)-H(57C) | 109.5     |
| C(56)-C(58)-H(58A)  | 109.5     |
| C(56)-C(58)-H(58B)  | 109.5     |
| H(58A)-C(58)-H(58B) | 109.5     |
| C(56)-C(58)-H(58C)  | 109.5     |
| H(58A)-C(58)-H(58C) | 109.5     |
| H(58B)-C(58)-H(58C) | 109.5     |
| C(60)-C(59)-C(64)   | 122.1(10) |
| C(60)-C(59)-N(4)    | 120.0(9)  |
| C(64)-C(59)-N(4)    | 117.8(9)  |
| C(59)-C(60)-C(61)   | 118.4(9)  |
| C(59)-C(60)-C(65)   | 122.2(10) |
| C(61)-C(60)-C(65)   | 119.3(9)  |
| C(62)-C(61)-C(60)   | 120.9(10) |
| C(62)-C(61)-H(61A)  | 119.6     |
| C(60)-C(61)-H(61A)  | 119.6     |
| C(61)-C(62)-C(63)   | 120.6(11) |
| C(61)-C(62)-H(62A)  | 119.7     |
| C(63)-C(62)-H(62A)  | 119.7     |

|                     |           |
|---------------------|-----------|
| C(62)-C(63)-C(64)   | 121.0(10) |
| C(62)-C(63)-H(63A)  | 119.5     |
| C(64)-C(63)-H(63A)  | 119.5     |
| C(63)-C(64)-C(59)   | 116.8(9)  |
| C(63)-C(64)-C(68)   | 118.4(9)  |
| C(59)-C(64)-C(68)   | 124.8(10) |
| C(60)-C(65)-C(67)   | 113.0(8)  |
| C(60)-C(65)-C(66)   | 112.1(10) |
| C(67)-C(65)-C(66)   | 109.0(8)  |
| C(60)-C(65)-H(65A)  | 107.5     |
| C(67)-C(65)-H(65A)  | 107.5     |
| C(66)-C(65)-H(65A)  | 107.5     |
| C(65)-C(66)-H(66A)  | 109.5     |
| C(65)-C(66)-H(66B)  | 109.5     |
| H(66A)-C(66)-H(66B) | 109.5     |
| C(65)-C(66)-H(66C)  | 109.5     |
| H(66A)-C(66)-H(66C) | 109.5     |
| H(66B)-C(66)-H(66C) | 109.5     |
| C(65)-C(67)-H(67A)  | 109.5     |
| C(65)-C(67)-H(67B)  | 109.5     |
| H(67A)-C(67)-H(67B) | 109.5     |
| C(65)-C(67)-H(67C)  | 109.5     |
| H(67A)-C(67)-H(67C) | 109.5     |
| H(67B)-C(67)-H(67C) | 109.5     |
| C(64)-C(68)-C(69)   | 111.5(11) |
| C(64)-C(68)-C(70)   | 116.9(11) |
| C(69)-C(68)-C(70)   | 109.8(10) |
| C(64)-C(68)-H(68A)  | 105.9     |
| C(69)-C(68)-H(68A)  | 105.9     |
| C(70)-C(68)-H(68A)  | 105.9     |
| C(68)-C(69)-H(69A)  | 109.5     |
| C(68)-C(69)-H(69B)  | 109.5     |
| H(69A)-C(69)-H(69B) | 109.5     |
| C(68)-C(69)-H(69C)  | 109.5     |
| H(69A)-C(69)-H(69C) | 109.5     |
| H(69B)-C(69)-H(69C) | 109.5     |

|                     |       |
|---------------------|-------|
| C(68)-C(70)-H(70A)  | 109.5 |
| C(68)-C(70)-H(70B)  | 109.5 |
| H(70A)-C(70)-H(70B) | 109.5 |
| C(68)-C(70)-H(70C)  | 109.5 |
| H(70A)-C(70)-H(70C) | 109.5 |
| H(70B)-C(70)-H(70C) | 109.5 |

---

Symmetry transformations used to generate equivalent atoms:



Table 4. Anisotropic displacement parameters ( $\text{\AA}^2 \times 10^3$ ) for 4. The anisotropic displacement factor exponent takes the form:  $-2\pi^2 [ h^2 a^{*2} U^{11} + \dots + 2 h k a^* b^* U^{12} ]$

|       | $U^{11}$ | $U^{22}$ | $U^{33}$ | $U^{23}$ | $U^{13}$ | $U^{12}$ |
|-------|----------|----------|----------|----------|----------|----------|
| S(1)  | 30(2)    | 23(2)    | 32(2)    | -2(1)    | -3(1)    | -9(1)    |
| P(1)  | 30(2)    | 22(2)    | 30(2)    | -2(1)    | -4(1)    | -11(1)   |
| P(2)  | 34(2)    | 20(2)    | 28(2)    | 2(1)     | -3(1)    | -12(1)   |
| N(1)  | 31(5)    | 16(5)    | 31(6)    | 6(4)     | -9(4)    | -13(4)   |
| N(2)  | 21(5)    | 21(5)    | 19(5)    | 4(4)     | -3(4)    | -7(4)    |
| N(3)  | 28(5)    | 24(5)    | 31(6)    | 2(4)     | 3(4)     | -15(4)   |
| N(4)  | 29(5)    | 28(5)    | 32(6)    | -3(4)    | -1(4)    | -12(4)   |
| N(5)  | 34(6)    | 27(5)    | 26(6)    | 0(4)     | -1(4)    | -8(4)    |
| C(1)  | 40(7)    | 21(6)    | 26(7)    | 6(5)     | -10(5)   | -17(5)   |
| C(2)  | 41(7)    | 35(7)    | 22(6)    | 7(5)     | -10(5)   | -24(6)   |
| C(3)  | 33(6)    | 20(6)    | 36(7)    | -6(5)    | 7(5)     | -16(5)   |
| C(4)  | 33(7)    | 30(7)    | 30(7)    | -1(5)    | -3(5)    | -9(6)    |
| C(9)  | 23(6)    | 24(6)    | 35(7)    | 1(5)     | -6(5)    | -5(5)    |
| C(11) | 41(8)    | 29(7)    | 30(7)    | 2(6)     | -6(6)    | -9(6)    |
| C(12) | 43(8)    | 55(9)    | 35(8)    | 0(7)     | -11(6)   | -23(7)   |
| C(13) | 65(10)   | 48(9)    | 59(10)   | 3(7)     | -27(8)   | -10(8)   |
| C(14) | 41(8)    | 50(9)    | 50(10)   | -10(7)   | -23(7)   | 2(7)     |
| C(15) | 46(8)    | 53(9)    | 44(8)    | 0(7)     | -15(6)   | -25(7)   |
| C(16) | 39(7)    | 24(6)    | 36(8)    | -4(5)    | -8(6)    | -11(6)   |
| C(23) | 31(7)    | 24(6)    | 30(7)    | -1(5)    | 3(5)     | -17(5)   |
| C(24) | 32(7)    | 24(6)    | 32(7)    | -3(5)    | 3(5)     | -10(5)   |
| C(25) | 50(8)    | 8(6)     | 65(9)    | -2(6)    | -1(7)    | -12(6)   |
| C(26) | 51(8)    | 20(7)    | 82(10)   | 12(6)    | -3(7)    | -19(6)   |
| C(27) | 33(7)    | 30(7)    | 71(10)   | -4(6)    | 3(6)     | -13(6)   |
| C(28) | 30(7)    | 18(6)    | 47(8)    | -4(5)    | -1(6)    | -13(5)   |
| C(29) | 34(7)    | 23(6)    | 35(7)    | -5(5)    | -7(6)    | -8(5)    |
| C(30) | 53(8)    | 21(6)    | 52(8)    | -4(6)    | -5(6)    | -13(6)   |
| C(31) | 62(8)    | 32(7)    | 33(8)    | -3(6)    | -3(6)    | -9(6)    |
| C(32) | 35(7)    | 34(7)    | 35(7)    | -17(6)   | -7(6)    | -8(6)    |
| C(33) | 32(7)    | 45(8)    | 52(8)    | -13(6)   | 1(6)     | -9(6)    |
| C(34) | 33(7)    | 30(7)    | 63(9)    | -1(6)    | -8(6)    | -15(6)   |

|       |         |         |        |         |        |          |
|-------|---------|---------|--------|---------|--------|----------|
| C(35) | 23(6)   | 32(7)   | 26(7)  | 3(5)    | -2(5)  | -10(5)   |
| C(36) | 20(6)   | 19(6)   | 40(7)  | 1(5)    | -9(5)  | -1(5)    |
| C(37) | 18(6)   | 47(8)   | 48(8)  | 1(6)    | 5(6)   | -18(6)   |
| C(38) | 47(8)   | 52(8)   | 35(8)  | 7(6)    | -5(6)  | -30(7)   |
| C(39) | 29(6)   | 38(7)   | 48(8)  | -9(6)   | 8(6)   | -21(6)   |
| C(40) | 25(6)   | 36(7)   | 31(7)  | -2(5)   | 3(5)   | -17(6)   |
| C(41) | 40(7)   | 25(6)   | 30(7)  | 5(5)    | -2(5)  | -20(6)   |
| C(42) | 53(8)   | 35(7)   | 41(8)  | 1(6)    | -10(6) | -17(6)   |
| C(43) | 44(7)   | 26(7)   | 51(8)  | 5(6)    | -6(6)  | -9(6)    |
| C(44) | 40(7)   | 31(7)   | 30(7)  | -12(6)  | -5(6)  | -12(6)   |
| C(45) | 41(7)   | 26(7)   | 49(8)  | 6(6)    | 3(6)   | -1(6)    |
| C(46) | 41(7)   | 43(8)   | 46(8)  | -15(6)  | -1(6)  | -14(6)   |
| C(47) | 34(7)   | 44(8)   | 24(7)  | 5(6)    | -1(5)  | -16(6)   |
| C(48) | 53(8)   | 20(6)   | 37(8)  | 14(6)   | -3(6)  | -14(6)   |
| C(49) | 79(10)  | 30(8)   | 48(9)  | 10(7)   | -9(8)  | -14(7)   |
| C(50) | 101(12) | 36(9)   | 56(11) | 17(7)   | -23(9) | -8(8)    |
| C(51) | 68(9)   | 56(9)   | 36(8)  | 9(7)    | -27(7) | -22(8)   |
| C(52) | 25(6)   | 43(7)   | 31(7)  | 12(6)   | -11(5) | -15(6)   |
| C(53) | 41(7)   | 29(7)   | 38(8)  | 14(6)   | -10(6) | -15(6)   |
| C(54) | 61(8)   | 19(6)   | 50(8)  | 3(6)    | 14(6)  | -17(6)   |
| C(55) | 61(9)   | 34(7)   | 47(8)  | 2(6)    | -6(7)  | -12(7)   |
| C(56) | 61(8)   | 38(7)   | 33(8)  | -4(6)   | -15(6) | -25(6)   |
| C(57) | 45(8)   | 66(9)   | 47(8)  | 1(7)    | -6(6)  | -36(7)   |
| C(58) | 73(9)   | 83(11)  | 51(9)  | 0(8)    | -9(7)  | -56(9)   |
| C(59) | 32(6)   | 13(6)   | 30(7)  | 4(5)    | 3(5)   | -10(5)   |
| C(60) | 34(6)   | 19(6)   | 29(7)  | 0(5)    | -9(5)  | -8(5)    |
| C(61) | 57(8)   | 29(7)   | 22(7)  | 11(6)   | 0(6)   | -5(6)    |
| C(62) | 67(9)   | 16(6)   | 44(8)  | 9(6)    | -18(7) | -12(6)   |
| C(63) | 53(8)   | 28(7)   | 61(10) | -15(7)  | -3(7)  | -21(6)   |
| C(64) | 37(7)   | 22(6)   | 29(7)  | 1(5)    | -8(5)  | -13(5)   |
| C(65) | 36(7)   | 28(6)   | 31(7)  | 6(5)    | -20(6) | -9(5)    |
| C(66) | 71(9)   | 25(7)   | 37(8)  | 9(6)    | -14(7) | -17(6)   |
| C(67) | 55(8)   | 46(8)   | 54(9)  | 14(6)   | -19(7) | -29(7)   |
| C(68) | 78(10)  | 29(7)   | 44(9)  | 4(6)    | -12(8) | -25(7)   |
| C(69) | 118(14) | 200(20) | 58(11) | -31(12) | 8(10)  | -118(15) |
| C(70) | 66(9)   | 67(10)  | 66(10) | -21(8)  | 13(8)  | -30(8)   |



Table 5. Hydrogen coordinates ( $\times 10^4$ ) and isotropic displacement parameters ( $\text{\AA}^2 \times 10^{-3}$ ) for 4.

|        | x     | y     | z    | U(eq) |
|--------|-------|-------|------|-------|
| H(1A)  | 5436  | 2545  | 4856 | 33    |
| H(1B)  | 6776  | 1783  | 4628 | 33    |
| H(2A)  | 6341  | 454   | 4085 | 36    |
| H(2B)  | 5445  | 782   | 4809 | 36    |
| H(3A)  | 9316  | 798   | 1376 | 34    |
| H(3B)  | 9670  | 542   | 501  | 34    |
| H(4A)  | 9972  | -1312 | 667  | 39    |
| H(4B)  | 10379 | -1119 | 1457 | 39    |
| H(12)  | 4386  | 3684  | 855  | 51    |
| H(13)  | 2401  | 4839  | 769  | 73    |
| H(14)  | 1030  | 4326  | 1401 | 63    |
| H(15)  | 1614  | 2719  | 2162 | 55    |
| H(16)  | 3574  | 1643  | 2324 | 40    |
| H(25A) | 5163  | 6315  | 3489 | 49    |
| H(26A) | 7095  | 5947  | 3468 | 60    |
| H(27A) | 8480  | 4078  | 3557 | 54    |
| H(29A) | 3924  | 4341  | 3874 | 37    |
| H(30A) | 3913  | 4865  | 2573 | 64    |
| H(30B) | 3610  | 6130  | 2782 | 64    |
| H(30C) | 2690  | 5608  | 2986 | 64    |
| H(31A) | 2620  | 6057  | 4356 | 69    |
| H(31B) | 3502  | 6614  | 4123 | 69    |
| H(31C) | 3803  | 5659  | 4770 | 69    |
| H(32)  | 7963  | 1621  | 3682 | 44    |
| H(33A) | 8915  | 2122  | 2593 | 68    |
| H(33B) | 9803  | 1131  | 3093 | 68    |
| H(33C) | 9702  | 2382  | 3141 | 68    |
| H(34A) | 9513  | 1247  | 4481 | 61    |
| H(34B) | 8269  | 1994  | 4867 | 61    |
| H(34C) | 9099  | 2571  | 4545 | 61    |

|        |       |       |       |    |
|--------|-------|-------|-------|----|
| H(37A) | 3490  | -1084 | 3535  | 44 |
| H(38A) | 1679  | -47   | 4095  | 50 |
| H(39A) | 1209  | 1751  | 4494  | 44 |
| H(41A) | 5693  | -108  | 3132  | 35 |
| H(42A) | 4781  | -416  | 2158  | 65 |
| H(42B) | 4778  | -1525 | 2575  | 65 |
| H(42C) | 5976  | -1486 | 2277  | 65 |
| H(43A) | 6780  | -2000 | 3465  | 63 |
| H(43B) | 5640  | -2086 | 3841  | 63 |
| H(43C) | 6140  | -1299 | 4193  | 63 |
| H(44A) | 3119  | 3083  | 4545  | 41 |
| H(45A) | 2304  | 3701  | 3370  | 65 |
| H(45B) | 1548  | 4602  | 3981  | 65 |
| H(45C) | 1090  | 3734  | 3702  | 65 |
| H(46A) | 1908  | 2731  | 5535  | 66 |
| H(46B) | 830   | 3375  | 5025  | 66 |
| H(46C) | 1523  | 4031  | 5318  | 66 |
| H(49A) | 6474  | 4296  | -7    | 67 |
| H(50A) | 5878  | 3881  | -1078 | 86 |
| H(51A) | 6313  | 2040  | -1338 | 65 |
| H(53A) | 7723  | 2368  | 1510  | 44 |
| H(54A) | 5849  | 3919  | 1586  | 66 |
| H(54B) | 6440  | 4714  | 1239  | 66 |
| H(54C) | 6795  | 4096  | 2036  | 66 |
| H(55A) | 9240  | 2610  | 810   | 75 |
| H(55B) | 8800  | 3464  | 1485  | 75 |
| H(55C) | 8426  | 3906  | 653   | 75 |
| H(56A) | 7973  | -388  | -225  | 50 |
| H(57A) | 8577  | -52   | -1468 | 57 |
| H(57B) | 7293  | 310   | -1729 | 57 |
| H(57C) | 8043  | -958  | -1462 | 57 |
| H(58A) | 6013  | 76    | 101   | 91 |
| H(58B) | 6449  | -838  | -538  | 91 |
| H(58C) | 5687  | 453   | -748  | 91 |
| H(61A) | 10087 | -3391 | 3459  | 50 |
| H(62A) | 9466  | -4657 | 3041  | 52 |

|        |       |       |      |     |
|--------|-------|-------|------|-----|
| H(63A) | 8511  | -4304 | 1947 | 55  |
| H(65A) | 9503  | -670  | 2614 | 39  |
| H(66A) | 8451  | -800  | 3751 | 67  |
| H(66B) | 9476  | -457  | 3913 | 67  |
| H(66C) | 9620  | -1718 | 4078 | 67  |
| H(67A) | 11480 | -2007 | 2429 | 73  |
| H(67B) | 11458 | -2380 | 3294 | 73  |
| H(67C) | 11307 | -1133 | 3065 | 73  |
| H(68A) | 7754  | -1866 | 792  | 59  |
| H(69A) | 8674  | -3015 | -164 | 131 |
| H(69B) | 9307  | -4051 | 398  | 131 |
| H(69C) | 9633  | -2997 | 355  | 131 |
| H(70A) | 6537  | -2734 | 1303 | 98  |
| H(70B) | 7418  | -3872 | 919  | 98  |
| H(70C) | 6735  | -2783 | 410  | 98  |

---

Table 6. Torsion angles [°] for 4.

---

|                      |           |
|----------------------|-----------|
| N(2)-P(1)-N(1)-C(23) | -162.3(8) |
| C(9)-P(1)-N(1)-C(23) | 91.9(8)   |
| N(2)-P(1)-N(1)-C(1)  | -9.3(6)   |
| C(9)-P(1)-N(1)-C(1)  | -115.1(7) |
| N(1)-P(1)-N(2)-C(35) | 168.4(7)  |
| C(9)-P(1)-N(2)-C(35) | -90.0(8)  |
| N(1)-P(1)-N(2)-C(2)  | -16.7(7)  |
| C(9)-P(1)-N(2)-C(2)  | 84.9(7)   |
| N(4)-P(2)-N(3)-C(47) | 162.6(8)  |
| S(1)-P(2)-N(3)-C(47) | -99.6(8)  |
| N(4)-P(2)-N(3)-C(3)  | -24.9(6)  |
| S(1)-P(2)-N(3)-C(3)  | 72.9(6)   |
| N(3)-P(2)-N(4)-C(59) | -175.8(8) |
| S(1)-P(2)-N(4)-C(59) | 79.6(7)   |
| N(3)-P(2)-N(4)-C(4)  | 2.3(7)    |
| S(1)-P(2)-N(4)-C(4)  | -102.2(6) |
| C(23)-N(1)-C(1)-C(2) | -174.9(8) |
| P(1)-N(1)-C(1)-C(2)  | 30.2(9)   |
| C(35)-N(2)-C(2)-C(1) | -149.3(8) |
| P(1)-N(2)-C(2)-C(1)  | 35.7(9)   |
| N(1)-C(1)-C(2)-N(2)  | -39.4(10) |
| C(47)-N(3)-C(3)-C(4) | -148.2(9) |
| P(2)-N(3)-C(3)-C(4)  | 39.0(9)   |
| C(59)-N(4)-C(4)-C(3) | -162.8(8) |
| P(2)-N(4)-C(4)-C(3)  | 18.9(9)   |
| N(3)-C(3)-C(4)-N(4)  | -33.9(9)  |
| C(11)-N(5)-C(9)-S(1) | 173.5(8)  |
| C(11)-N(5)-C(9)-P(1) | -15.7(14) |
| P(2)-S(1)-C(9)-N(5)  | -21.3(9)  |
| P(2)-S(1)-C(9)-P(1)  | 168.0(6)  |
| N(2)-P(1)-C(9)-N(5)  | 123.4(9)  |
| N(1)-P(1)-C(9)-N(5)  | -143.4(9) |
| N(2)-P(1)-C(9)-S(1)  | -66.1(7)  |
| N(1)-P(1)-C(9)-S(1)  | 27.0(8)   |

|                         |            |
|-------------------------|------------|
| C(9)-N(5)-C(11)-C(16)   | -53.1(15)  |
| C(9)-N(5)-C(11)-C(12)   | 128.4(11)  |
| C(16)-C(11)-C(12)-C(13) | 5.2(16)    |
| N(5)-C(11)-C(12)-C(13)  | -176.2(9)  |
| C(11)-C(12)-C(13)-C(14) | -4.5(17)   |
| C(12)-C(13)-C(14)-C(15) | 1.2(18)    |
| C(13)-C(14)-C(15)-C(16) | 1.4(17)    |
| C(12)-C(11)-C(16)-C(15) | -2.7(16)   |
| N(5)-C(11)-C(16)-C(15)  | 178.8(9)   |
| C(14)-C(15)-C(16)-C(11) | -0.7(16)   |
| C(1)-N(1)-C(23)-C(28)   | 73.0(12)   |
| P(1)-N(1)-C(23)-C(28)   | -135.3(8)  |
| C(1)-N(1)-C(23)-C(24)   | -106.5(10) |
| P(1)-N(1)-C(23)-C(24)   | 45.2(13)   |
| C(28)-C(23)-C(24)-C(25) | 3.6(15)    |
| N(1)-C(23)-C(24)-C(25)  | -176.9(10) |
| C(28)-C(23)-C(24)-C(29) | -176.7(10) |
| N(1)-C(23)-C(24)-C(29)  | 2.9(14)    |
| C(23)-C(24)-C(25)-C(26) | -4.0(17)   |
| C(29)-C(24)-C(25)-C(26) | 176.3(10)  |
| C(24)-C(25)-C(26)-C(27) | 2.3(18)    |
| C(25)-C(26)-C(27)-C(28) | 0.0(18)    |
| C(26)-C(27)-C(28)-C(23) | -0.2(17)   |
| C(26)-C(27)-C(28)-C(32) | -179.0(10) |
| N(1)-C(23)-C(28)-C(27)  | 178.9(10)  |
| C(24)-C(23)-C(28)-C(27) | -1.6(15)   |
| N(1)-C(23)-C(28)-C(32)  | -2.4(15)   |
| C(24)-C(23)-C(28)-C(32) | 177.1(9)   |
| C(25)-C(24)-C(29)-C(31) | -50.5(14)  |
| C(23)-C(24)-C(29)-C(31) | 129.7(10)  |
| C(25)-C(24)-C(29)-C(30) | 71.6(12)   |
| C(23)-C(24)-C(29)-C(30) | -108.1(11) |
| C(27)-C(28)-C(32)-C(34) | 71.1(13)   |
| C(23)-C(28)-C(32)-C(34) | -107.6(12) |
| C(27)-C(28)-C(32)-C(33) | -51.8(13)  |
| C(23)-C(28)-C(32)-C(33) | 129.5(11)  |



|                         |            |
|-------------------------|------------|
| C(2)-N(2)-C(35)-C(40)   | 106.8(11)  |
| P(1)-N(2)-C(35)-C(40)   | -78.6(11)  |
| C(2)-N(2)-C(35)-C(36)   | -67.7(12)  |
| P(1)-N(2)-C(35)-C(36)   | 106.9(9)   |
| C(40)-C(35)-C(36)-C(37) | -1.2(15)   |
| N(2)-C(35)-C(36)-C(37)  | 173.3(9)   |
| C(40)-C(35)-C(36)-C(41) | 176.6(9)   |
| N(2)-C(35)-C(36)-C(41)  | -8.9(14)   |
| C(35)-C(36)-C(37)-C(38) | -0.1(16)   |
| C(41)-C(36)-C(37)-C(38) | -178.0(9)  |
| C(36)-C(37)-C(38)-C(39) | 0.9(17)    |
| C(37)-C(38)-C(39)-C(40) | -0.3(17)   |
| C(38)-C(39)-C(40)-C(35) | -1.0(16)   |
| C(38)-C(39)-C(40)-C(44) | 178.9(10)  |
| N(2)-C(35)-C(40)-C(39)  | -172.7(10) |
| C(36)-C(35)-C(40)-C(39) | 1.7(15)    |
| N(2)-C(35)-C(40)-C(44)  | 7.4(15)    |
| C(36)-C(35)-C(40)-C(44) | -178.2(9)  |
| C(37)-C(36)-C(41)-C(42) | 50.0(13)   |
| C(35)-C(36)-C(41)-C(42) | -127.7(10) |
| C(37)-C(36)-C(41)-C(43) | -73.2(12)  |
| C(35)-C(36)-C(41)-C(43) | 109.0(11)  |
| C(39)-C(40)-C(44)-C(46) | 35.3(14)   |
| C(35)-C(40)-C(44)-C(46) | -144.7(10) |
| C(39)-C(40)-C(44)-C(45) | -84.5(13)  |
| C(35)-C(40)-C(44)-C(45) | 95.4(11)   |
| C(3)-N(3)-C(47)-C(52)   | 109.4(11)  |
| P(2)-N(3)-C(47)-C(52)   | -78.8(12)  |
| C(3)-N(3)-C(47)-C(48)   | -68.8(13)  |
| P(2)-N(3)-C(47)-C(48)   | 103.0(11)  |
| C(52)-C(47)-C(48)-C(49) | 0.4(17)    |
| N(3)-C(47)-C(48)-C(49)  | 178.5(10)  |
| C(52)-C(47)-C(48)-C(53) | -177.8(10) |
| N(3)-C(47)-C(48)-C(53)  | 0.4(16)    |
| C(47)-C(48)-C(49)-C(50) | 2.7(19)    |
| C(53)-C(48)-C(49)-C(50) | -179.2(12) |

|                         |            |
|-------------------------|------------|
| C(48)-C(49)-C(50)-C(51) | -3(2)      |
| C(49)-C(50)-C(51)-C(52) | 0(2)       |
| C(50)-C(51)-C(52)-C(47) | 2.4(19)    |
| C(50)-C(51)-C(52)-C(56) | 178.5(13)  |
| C(48)-C(47)-C(52)-C(51) | -2.8(17)   |
| N(3)-C(47)-C(52)-C(51)  | 179.1(10)  |
| C(48)-C(47)-C(52)-C(56) | -178.8(11) |
| N(3)-C(47)-C(52)-C(56)  | 3.1(15)    |
| C(49)-C(48)-C(53)-C(54) | 47.2(15)   |
| C(47)-C(48)-C(53)-C(54) | -134.7(11) |
| C(49)-C(48)-C(53)-C(55) | -75.7(13)  |
| C(47)-C(48)-C(53)-C(55) | 102.3(13)  |
| C(51)-C(52)-C(56)-C(58) | -75.8(14)  |
| C(47)-C(52)-C(56)-C(58) | 100.1(12)  |
| C(51)-C(52)-C(56)-C(57) | 46.9(15)   |
| C(47)-C(52)-C(56)-C(57) | -137.3(10) |
| C(4)-N(4)-C(59)-C(60)   | 70.2(12)   |
| P(2)-N(4)-C(59)-C(60)   | -111.7(9)  |
| C(4)-N(4)-C(59)-C(64)   | -107.0(10) |
| P(2)-N(4)-C(59)-C(64)   | 71.1(11)   |
| C(64)-C(59)-C(60)-C(61) | -0.3(15)   |
| N(4)-C(59)-C(60)-C(61)  | -177.4(9)  |
| C(64)-C(59)-C(60)-C(65) | -178.5(9)  |
| N(4)-C(59)-C(60)-C(65)  | 4.4(15)    |
| C(59)-C(60)-C(61)-C(62) | -2.2(16)   |
| C(65)-C(60)-C(61)-C(62) | 176.1(10)  |
| C(60)-C(61)-C(62)-C(63) | 1.4(17)    |
| C(61)-C(62)-C(63)-C(64) | 1.9(17)    |
| C(62)-C(63)-C(64)-C(59) | -4.1(16)   |
| C(62)-C(63)-C(64)-C(68) | 174.0(10)  |
| C(60)-C(59)-C(64)-C(63) | 3.3(15)    |
| N(4)-C(59)-C(64)-C(63)  | -179.6(9)  |
| C(60)-C(59)-C(64)-C(68) | -174.6(10) |
| N(4)-C(59)-C(64)-C(68)  | 2.5(15)    |
| C(59)-C(60)-C(65)-C(67) | -112.6(11) |
| C(61)-C(60)-C(65)-C(67) | 69.2(13)   |

|                         |            |
|-------------------------|------------|
| C(59)-C(60)-C(65)-C(66) | 123.9(11)  |
| C(61)-C(60)-C(65)-C(66) | -54.3(12)  |
| C(63)-C(64)-C(68)-C(69) | -86.1(14)  |
| C(59)-C(64)-C(68)-C(69) | 91.7(14)   |
| C(63)-C(64)-C(68)-C(70) | 41.4(14)   |
| C(59)-C(64)-C(68)-C(70) | -140.7(11) |

---

Symmetry transformations used to generate equivalent atoms:
